1 **Development of a novel oral treatment that rescues gait ataxia and retinal degeneration in a**  
2 **phenotypic mouse model of familial dysautonomia.**

3

4 Elisabetta Morini<sup>1,2,\*</sup>, Anil Chekuri<sup>1,2,3</sup>, Emily M. Logan<sup>1</sup>, Jessica M. Bolduc<sup>1</sup>, Emily G. Kirchner<sup>1</sup>,  
5 Monica Salani<sup>1</sup>, Aram J. Krauson<sup>1</sup>, Jana Narasimhan<sup>4</sup>, Vijayalakshmi Gabbeta<sup>4</sup>, Shivani Grover<sup>4</sup>,  
6 Amal Dakka<sup>4</sup>, Anna Mollin<sup>4</sup>, Stephen P. Jung<sup>4</sup>, Xin Zhao<sup>4</sup>, Nanjing Zhang<sup>4</sup>, Sophie Zhang<sup>4</sup>,  
7 Michael Arnold<sup>4</sup>, Matthew G. Woll<sup>4</sup>, Nikolai A. Naryshkin<sup>4</sup>, Marla Weetall<sup>4</sup>, Susan A.  
8 Slaugenhaupt<sup>1,2,\*</sup>.

9

10 <sup>1</sup> Center for Genomic Medicine, Massachusetts General Hospital Research Institute, Boston, MA.

11 <sup>2</sup> Department of Neurology, Massachusetts General Hospital Research Institute and Harvard  
12 Medical School, Boston, MA.

13 <sup>3</sup> Grousbeck Gene Therapy Center, Schepens Eye Research Institute and Massachusetts Eye and  
14 Ear Infirmary, Boston, MA,

15 <sup>4</sup> PTC Therapeutics, Inc., South Plainfield, NJ 07080.

16 \*Correspondence should be addressed to E. M. ([emorini@mgh.harvard.edu](mailto:emorini@mgh.harvard.edu)) and to S. A. S.  
17 ([slaugenhaupt@mgh.harvard.edu](mailto:slaugenhaupt@mgh.harvard.edu) )

18

19 Short title: Development of a novel oral treatment for FD.

20

21 **Abstract**

22 Familial Dysautonomia (FD) is a rare neurodegenerative disease caused by a splicing mutation in  
23 the Elongator complex protein 1 gene (*ELP1*). This mutation leads to the skipping of exon 20 and  
24 a tissue-specific reduction of ELP1 protein, mainly in the central and peripheral nervous systems.  
25 FD is a complex neurological disorder accompanied by severe gait ataxia and retinal degeneration.  
26 There is currently no effective treatment to restore ELP1 protein expression in individuals with  
27 FD, and the disease is ultimately fatal. After identifying kinetin as a small molecule able to correct  
28 the *ELP1* splicing defect, we worked on its optimization to generate novel splicing modulator  
29 compounds (SMCs) that can be used in patients. Here, we optimize the potency, efficacy, and bio-  
30 distribution of second-generation kinetin derivatives to develop an oral treatment for FD that can  
31 efficiently pass the blood-brain barrier and correct the *ELP1* splicing defect in the nervous system.  
32 We demonstrate that the novel compound, PTC258, efficiently restores correct *ELP1* splicing in  
33 mouse tissues, including brain, and most importantly, prevents the progressive neuronal  
34 degeneration that is characteristic of FD. Postnatal oral administration of PTC258 to the  
35 phenotypic mouse model *TgFD9;Elp1<sup>Δ20/flox</sup>* increases full-length *ELP1* transcript in a dose-  
36 dependent manner and leads to a two-fold increase in functional ELP1 protein in the brain.  
37 Remarkably, PTC258 treatment improves survival, gait ataxia, and retinal degeneration in the  
38 phenotypic FD mice. Our findings highlight the great therapeutic potential of this novel class of  
39 small molecules as an oral treatment for FD.

40

## 41 **Introduction**

42 Familial dysautonomia (FD), also known as Riley-Day syndrome or hereditary sensory and  
43 autonomic neuropathy type III (OMIM223900, MIM603722), is an autosomal recessive  
44 neurodegenerative disease caused by a splicing mutation in the Elongator complex protein 1  
45 (*ELP1*, formerly called *IKBKAP*). This mutation results in variable tissue-specific skipping of exon  
46 20 with a corresponding reduction of ELP1 protein in the central and peripheral nervous systems.  
47 ELP1 is the scaffolding subunit of the human Elongator complex, a highly conserved protein  
48 complex that participates in distinct cellular processes, including transcriptional elongation,  
49 acetylation of cytoskeletal  $\alpha$ -tubulin, and tRNA modification<sup>1-11</sup>. ELP1 function has been  
50 extensively studied and has been implicated in exocytosis, cytoskeletal organization, axonal  
51 transport, and cellular adhesion and migration<sup>12-16</sup>. Recent studies highlighted the role of ELP1 in  
52 neurogenesis, neuronal survival, and peripheral tissue innervation<sup>17-23</sup>.

53 FD occurs almost exclusively in Ashkenazi Jews, with a carrier frequency of 1 in 32 in the general  
54 Ashkenazi Jewish population and 1 in 19 in Ashkenazi Jews of Polish descent<sup>24,25</sup>. The clinical  
55 features of FD are all due to a striking progressive depletion of unmyelinated sensory and  
56 autonomic neurons<sup>26-30</sup>. Patients with FD have a complex neurological phenotype that includes  
57 diminished pain and temperature perception, decreased or absent myotatic reflexes, proprioceptive  
58 ataxia, and progressive retinal degeneration<sup>28,31-39</sup>. The lack of afferent baroreceptor signaling  
59 causes complete failure of blood pressure regulation, and the recurrent hypertensive vomiting  
60 attacks are referred to as “dysautonomic crises”<sup>27,40-43</sup>. Unexplained sudden death, aspiration  
61 pneumonia, and respiratory insufficiency remain the leading causes of death<sup>32,44</sup>.

62 Many debilitating symptoms of the disease are due to progressive impairment of proprioception  
63 and retinal degeneration<sup>38,39,44-46</sup>. Lack of afferent signaling from the muscle spindles accounts for

64 the absence of deep tendon reflexes and gait ataxia<sup>39,45</sup>. Children with FD are uncoordinated and  
65 tend to fall. As they age, progressive impairment in proprioception leads to severe gait ataxia, and  
66 they eventually lose the ability to ambulate independently<sup>39,45</sup>. Neuropathological analysis of  
67 autopsy material from individuals with FD showed grossly reduced volume and number of neurons  
68 in the dorsal root ganglia (DRG)<sup>30</sup>. Another debilitating aspect of FD that severely affects patients’  
69 quality of life is progressive retinal degeneration, leading to visual dysfunction<sup>35,47,48</sup>. Initially, it  
70 was reported that the loss of vision in FD patients resulted from corneal opacities,  
71 neovascularization, and sensory defects such as corneal analgesia, severe dry eye, ulceration  
72 healing, and incomplete closure of eyelids<sup>49-53</sup>. However, recent detailed studies have shown that  
73 decreased visual acuity, loss of central vision, and temporal optic nerve pallor occur in FD patients  
74 even without any corneal complications, suggesting a neuro-ophthalmic nature of the disease<sup>47</sup>.  
75 In FD, visual impairment is usually early-onset and often progresses to legal blindness in the third  
76 decade of life<sup>35</sup>. Individuals with FD show a significant reduction in the retinal nerve fiber layer  
77 (RNFL) due to the death of retinal ganglion cells (RGCs)<sup>35,47,48</sup>.

78 The field has undertaken many efforts to develop novel therapies to correct *ELP1* splicing defects,  
79 including splicing modulator compounds (SMCs), antisense oligonucleotides (ASO), and  
80 modified exon-specific U1 small nuclear RNAs (snRNAs)<sup>54-56</sup>. Despite significant progress, we  
81 do not yet have a systemic therapy to prevent disease progression. Our team identified the small  
82 molecule kinetin (6-furfurylaminopurine) as an orally active splicing modulator of *ELP1* both *in*  
83 *vitro* and *in vivo*<sup>57,58</sup>. As part of the NIH Blueprint Neurotherapeutics Network, we have improved  
84 kinetin potency and efficacy and generated a more potent and efficacious *ELP1* splicing  
85 modulator, BPN-15477<sup>59,60</sup>. More recently, our collaboration with PTC Therapeutics, Inc. led to  
86 the generation of a new class of highly potent SMCs, using BPN-15477 as a starting molecule, and

87 to the identification of the novel compound PTC258. In this study, we describe the medicinal  
88 chemistry optimization of our new class of SMCs and we evaluate the efficacy of PTC258 in  
89 rescuing disease phenotypes in the FD mouse model *TgFD9; Elp1<sup>Δ20/flox</sup>*.

90

## 91 **Results**

### 92 **Identification of the highly potent splicing modulator PTC258.**

93 As part of the NIH Blueprint Neurotherapeutics Network, we identified a class of SMCs that  
94 selectively modulate *ELP1* pre-mRNA splicing and increase the inclusion of exon 20<sup>60,61</sup>. Here,  
95 we optimized the potency, efficacy, and distribution of these compounds to develop an oral  
96 treatment for FD that could efficiently cross the blood-brain barrier (BBB) and correct *ELP1*  
97 splicing defect in PNS and CNS. In collaboration with PTC Therapeutics Inc., we have generated  
98 hundreds of novel BPN15477-analogs and identified PTC258 as a potent and specific *ELP1*  
99 splicing modulator. All components of the BPN15477 molecule were probed with systematic  
100 structural modifications. Right/Eastern substitution was most tolerated and provided the most  
101 substantial gains in potency. In particular, the primary amino group attached by a 2-carbon chain  
102 was optimal when substituted at the 2-position with small alkyl groups, as exemplified by  
103 compound PTC102, where a 30X boost in potency was observed (Figure 1A). The stereochemistry  
104 at the 2-position was found to be very important, favoring the (S)-enantiomer (for methyl-  
105 substitution). Additional optimization was achieved by replacing the pyrrolopyrimidine core with  
106 thienopyridine. Not only could an additional >30X improvement in potency be achieved over  
107 PTC102, but the thienopyridine analogs, including PTC258, showed superior oral exposure in  
108 mice (Figure 1A). PTC258 efficiently increases full-length *ELP1* mRNA and protein in FD patient  
109 fibroblasts (Figure 1B and C), and it is about 30,000 times more potent than kinetin (EC<sub>2X</sub> ELP1

110 protein = 10,000 nM) and about 1,000 times more potent than BPN15477 (EC<sub>2X</sub> ELP1 protein =  
111 340 nM)<sup>60</sup>. We then assessed the ability of PTC258 to correct *ELP1* splicing and increase the  
112 amount of functional protein *in vivo*. We orally administered PTC258 to the *TgFD9* transgenic  
113 mouse <sup>62</sup>, which carries the human *ELP1* gene with the major FD splice mutation, and mice were  
114 sacrificed on the 7<sup>th</sup> day of treatment. Special chow was formulated to dose each mouse 3  
115 mg/kg/day (0.002% PTC258 diet), 6 mg/kg/day (0.004% PTC258 diet), 12 mg/kg/day (0.008%  
116 PTC258 diet) and 24 mg/kg/day (0.016% PTC258 diet). While this mouse is phenotypically  
117 normal, as it expresses normal amounts of endogenous *Elp1*, it is a great model to initially assess  
118 the effect of SMCs on *ELP1* splicing *in vivo* because it recapitulates the same tissue-specific  
119 splicing defect observed in patients <sup>62,63</sup>. PTC258 increased full-length *ELP1* transcript in a dose-  
120 dependent manner and, importantly, led to at least a 5-fold increase in functional ELP1 protein in  
121 the brain, trigeminal, liver, and quadricep (Fig. 1 D and E, Supplementary Fig. 1A and B). In  
122 addition, the treatment was well tolerated, no weight loss or adverse effects were observed in the  
123 treated groups, even at the highest concentration, and the level of splicing correction correlated  
124 with PTC258 exposure (Supplementary Fig.1C and D). These results demonstrate that treatment  
125 with PTC258 corrects splicing of the *ELP1* transcript and significantly increases the amount of  
126 functional protein *in vivo* in all tissues tested, including the brain.

127

### 128 **Daily consumption of PTC258 improves gait ataxia and rescues retinal degeneration in the** 129 **FD phenotypic mouse.**

130 To assess the therapeutic efficacy of PTC258 on disease progression, we administered the  
131 treatment to the phenotypic FD mouse model *TgFD9; Elp1<sup>Δ20/flox</sup>*<sup>64</sup>. Special chow was formulated  
132 to dose each mouse 3 mg/kg/day (0.002% PTC258 diet) or 6 mg/kg/day (0.004% PTC258 diet).

133 At birth, pups were randomly assigned to the vehicle or one of the two PTC258-treatment groups.  
134 Mice were maintained in the same treatment regime for the entire trial duration and were sacrificed  
135 at 6 months of age for tissue collection. Our previous studies in the FD mouse show that by 6  
136 months of age the disease phenotype is evident and quantifiable <sup>56,59</sup>. We started the treatment at  
137 birth to maximize the therapeutic value, and a preliminary study that assessed ELP1 expression in  
138 transgenic pups after PTC258 treatment showed that this compound can pass from dams to pups  
139 through lactation and increase the functional ELP1 protein amounts in the pups (Supplementary  
140 Fig. 2). The treatment was well tolerated as no weight loss was observed in the PTC258-treated  
141 group (Supplementary Fig. 3A and B). Notably, PTC258 improved the survival of FD pups in a  
142 dose-dependent manner (Supplementary Fig. 3C). Since our mouse model correctly recapitulates  
143 the gait ataxia observed in patients<sup>39,45</sup>, we first evaluated the effect of treatment on gait at three  
144 and six months of age <sup>56,64</sup>. FD mouse gait was assessed using CatWalk XT (Noldus), a complete  
145 gait analysis system for quantitative assessment of footfalls and locomotion in mice <sup>65-67</sup>.  
146 Particularly, stride length and base of support are two of the most relevant parameters for assessing  
147 gait in mice <sup>68</sup>. The first is defined as the distance between successive placements of the same paw,  
148 while the latter represents the mean distance between hind paws (Fig. 2A). Our results show that  
149 the PTC258-treated FD mice exhibit a dose-dependent improvement in motor coordination at six  
150 months of age, as demonstrated by a progressive increase in stride length in PTC258-treated FD  
151 mice when compared with the vehicle-treated FD mice (Fig. 2B and C). The base of support was  
152 completely rescued in the 0.002% PTC258-treated group. In the 0.004% PTC258-treated group,  
153 although we observed a trend toward an increased base of support, the difference with the vehicle-  
154 treated FD mice was not statistically significant. One explanation can be that the sample size of  
155 the 0.004% PTC258-treated group was smaller compared with the 0.002% PTC258 treatment

156 group. As expected by the progressive nature of the disease, at three months of age, FD mice do  
157 not yet exhibit dramatic gait abnormalities, except for the base of support that is already  
158 significantly lower in the vehicle-treated mice when compared with control or PTC-treated FD  
159 mice (Supplementary Fig. 4).

160 Given that blindness is a debilitating aspect of FD, we evaluated for the first time the effect of our  
161 oral therapy to rescue retinal degeneration in the FD mice. Patients with FD show thinning of the  
162 RNFL layer due to the death of RGCs, and this loss is more profound near the temporal region of  
163 the optic nerve, specifically in the maculo-papillary region <sup>35,47,48</sup>. High-definition spectral-  
164 domain optical coherence tomography (SD-OCT) was used to measure the thickness of the RNFL  
165 and the ganglion cell-inner plexiform layer (GCIPL) in the superior, inferior, nasal, and temporal  
166 hemispheres of the mouse retina (Fig. 3A) <sup>59</sup>. At both ages, three and six months, we observed a  
167 significant reduction of the RNFL (Fig. 3B and D) and GCIPL (Fig. 3C and E) layers in each  
168 region of the vehicle-treated FD retinas. PTC258-treated FD mice showed a significant dose-  
169 dependent improvement in the thickness of both RNFL (Fig. 3B and D) and GCIPL (Fig. 3C and  
170 E). These results indicate that oral administration of PTC258 starting at birth prevents gait ataxia  
171 and retinal degeneration in the phenotypic FD mouse.

172

### 173 **PTC258 treatment prevents neuronal loss in FD DRG and retina.**

174 To confirm that the observed PTC258-mediated phenotypic improvement correlated with  
175 changes in the neuropathological hallmarks of the disease, we histologically characterized DRG  
176 and retinas from vehicle- and PTC258-treated mice. Individuals with FD have compromised fetal  
177 development and postnatal maintenance of DRG neurons, resulting in DRG of grossly reduced  
178 size and significantly reduced neuronal number <sup>30,69</sup>. Proprioceptors are the subpopulation of



179 neurons within the DRG responsible for sensory-motor coordination<sup>70,71</sup>. Consistent with the  
180 observed proprioceptive deficits, vehicle-treated FD mice showed a significant reduction in the  
181 volume of the DRG, and the number of proprioceptive neurons compared with their control  
182 littermates (Fig. 4A). The DRG volume in the FD mouse was 60% of the controls (Fig. 4B), while  
183 the number of the proprioceptive neurons was reduced to 55% compared with their control  
184 littermates (Fig. 4C). Importantly, the treatment was able to rescue both neuropathological aspects  
185 of the disease. PTC258-treated FD mice showed a significant increase in the number of  
186 proprioceptive neurons and volume of DRG (Fig. 4 B and C), demonstrating that starting the  
187 treatment at birth is sufficient to prevent the loss of this subpopulation of neurons.

188 To evaluate whether the rescue of RNFL and GCIPL thickness was due to the treatment effect  
189 on RGC survival, we performed RGC counts in the superior, inferior, nasal, and temporal regions  
190 of the retina using retinal whole-mount analysis. We stained retinas from 3 and 6-month-old mice  
191 using the RGC-specific marker RNA-binding protein with multiple splicing (RPBMS), and we  
192 counted the number of RPBMS<sup>+</sup> cells sited at 1mm from the optic nerve head (ONH) (Fig. 5A).  
193 As previously reported<sup>59</sup>, the FD mice at three months of age did not yet show a significant loss in  
194 RGC (Fig. 5B). However, in accordance with the progressive nature of retinal degeneration in FD  
195 patients, at six months of age, the number of RPBMS<sup>+</sup> cells became significantly lower in the  
196 vehicle treated-FD mice in the temporal, nasal, superior and inferior regions of the retina (Fig. 5C).  
197 Importantly, PTC258 treatment rescued RGC loss in a dose-responsive manner (Fig. 5C).  
198 Together, these results demonstrate that our oral treatment improves disease phenotype by halting  
199 the loss of specific neuronal populations in FD DRG and retina.

200

201 **PTC258 corrects *ELPI* splicing defect in PNS and CNS.**

202 Finally, we assessed if the phenotypic and neuropathological improvement observed in the treated  
203 FD mice correlates with the correction of the underlying FD splicing defect in PNS and CNS.  
204 *ELP1* splicing and protein amounts were analyzed in different neuronal tissues and liver from  
205 vehicle- and PTC258- treated FD mice. As shown in Figure 6, PTC258 treatment significantly  
206 increases *ELP1* exon 20 inclusion in the brain (Fig. 6A), DRG (Fig. 6B), trigeminal (Fig. 6C),  
207 retina (Fig. 6D), and liver (Fig. 6E). As expected, the improvement of exon 20 inclusion in the  
208 *ELP1* transcript results in higher protein production (Fig. 6A, B, and E). The treatment resulted in  
209 a 2-fold increase in functional ELP1 protein in the brain and a 1.5-fold increase in the DRG (Fig.  
210 6A and B). Because we used one retina for histology and the other to evaluate ELP splicing  
211 correction, there was no available tissue afterward to assess ELP1 protein expression. Together,  
212 these results provide the *in vivo* evidence that PTC258 increases the amount of ELP1 in CNS and  
213 PNS, thereby rescuing the primary neurologic FD phenotypes.

214

## 215 **Discussion**

216 FD is a complex sensory and autonomic neurodegenerative disease and, to date, there are no  
217 effective treatments to stop the continuous neuronal loss characteristic of this devastating disorder.  
218 A novel oral systemic therapy for FD will potentially revolutionize patient care. Importantly,  
219 because 99.5 % of FD patients are homozygous for the same splicing mutation in *ELP1*<sup>72,73</sup>,  
220 developing a treatment that precisely and efficiently targets the underlying genetic mechanism will  
221 benefit all patients. Many efforts have been undertaken to develop disease-modifying therapies  
222 including SMCs, ASO, and modified exon-specific U1 snRNAs<sup>54-56</sup>. These modalities have shown  
223 promising effects in mice<sup>54,56,74</sup>, confirming that *ELP1* splicing is a relevant therapeutic target.  
224 However, both ASO and U1 snRNA-based therapeutics have limitations, including poor brain

225 penetration and cellular uptake, toxicity due to immune stimulation, and an invasive route of  
226 administration <sup>75-78</sup>. The recent development of splicing targeted therapy for spinal muscular  
227 atrophy (SMA), another genetic disorder caused by a splicing alteration, has validated the utility  
228 of small molecules as a valuable therapeutic strategy for neurologic diseases <sup>79-83</sup>. With the goal of  
229 developing an oral compound for FD, in this study, we have optimized the potency, efficacy, and  
230 distribution of SMCs that were initially generated as part of the NIH Blueprint Neurotherapeutics  
231 Network <sup>61</sup>, and we have found a highly potent splicing modulator that efficiently passes the BBB  
232 and corrects *ELPI* splicing defect in PNS and CNS. We demonstrated that the novel compound,  
233 PTC258, efficiently restores correct *ELPI* splicing in several mouse tissues, including brain, and  
234 most importantly, prevents the progressive neuronal degeneration that is characteristic of FD.

235 Loss of proprioceptors accounts for many debilitating aspects of the disease, including  
236 progressive gait ataxia, spinal and craniofacial deformities, and respiratory insufficiency owing to  
237 neuromuscular incoordination <sup>39,45</sup>. We show that starting PTC258 treatment at birth rescues motor  
238 coordination in our FD phenotypic mouse model by preventing the loss of proprioceptors in the  
239 DRG. PTC258-treated FD mice showed increased DRG volume and number of proprioceptive  
240 neurons, indicating that increasing *ELPI* expression at birth is sufficient to prevent the loss of this  
241 subpopulation of neurons that play a critical role in disease progression. Similarly, we have tested  
242 the ability of our oral treatment to rescue progressive retinal degeneration. This is another  
243 significant debilitating aspect of the disease, as it severely affects patients' quality of life. FD  
244 patients suffer from optic neuropathy featured by reductions of the RNFL due to progressive loss  
245 of the macular RGCs. They often become visually impaired or legally blind after their third decade  
246 of life <sup>35,36</sup>. Postnatal retinal degeneration was also recapitulated in different mouse models of  
247 FD <sup>59,84</sup>. Supporting the idea that starting the treatment at birth can be sufficient to prevent this

248 aspect of the disease. Oral administration of PTC258 significantly improved the thickness of  
249 RNFL and GCIPL by promoting RGC survival. To our knowledge, this is the first *in vivo* evidence  
250 of an oral treatment used to rescue retinal degeneration in a human genetic disease. We confirm  
251 that the phenotypic improvement promoted by PTC258 treatment correlates with a significant  
252 increase in full-length *ELP1* mRNA, which leads to an increase in full-length *ELP1* transcript and  
253 a 2-fold increase in functional ELP1 protein in the brain and 1.5-fold increase in the DRG.

254 Although we recognize that further safety and toxicity studies will be needed to move our  
255 SMCs to the clinic, we and others have shown that these compounds are very specific and selective  
256 in promoting the recruitment of the spliceosomal machinery at weakly defined 5' splice sites<sup>9,85,86</sup>  
257<sup>60</sup>. In fact, we have previously demonstrated that this class of compounds does not cause  
258 widespread changes in gene expression and splicing<sup>56,60</sup>. Together, our work represents the first  
259 example of optimizing an orally bioavailable splicing modifier that corrects *ELP1* splicing in  
260 multiple tissues, including brain and retina, and provides the critical pre-clinical efficacy data  
261 needed for developing a novel oral treatment for FD patients.

262

## 263 **Materials and Methods**

### 264 **Study Design**

265 This study aimed to assess the therapeutic effectiveness of PTC258 in ameliorating neurological  
266 phenotypes *in vivo*. In this regard, we used the FD mouse model *TgFD9; Elp1<sup>Δ20/flox</sup>* because it  
267 recapitulates the same tissue-specific mis-splicing observed in individuals with FD and displays  
268 the hallmark symptoms of the disease, thus providing a powerful model for assessing the  
269 therapeutic efficacy of potential therapies. Treatment was started at birth to maximize the  
270 therapeutic value. At P0, regular mouse chow was replaced with vehicle diet (LabDiet® 5P00) or

271 PTC258 diets (LabDiet<sup>®</sup> 5P00 w/ 20 ppm or 40 ppm PTC258), and the dam, randomly assigned,  
272 continued to be fed these diets until the time of weaning. At weaning, *TgFD9; Ikkkap<sup>A20/flox</sup>* mice  
273 were genotyped and maintained in the same treatment groups. We formulated PTC258 chow to  
274 provide each mouse with a dose of 3 mg/Kg/day or 6 mg/Kg/day. We have demonstrated that this  
275 dose was sufficient to significantly improve *ELPI* splicing and protein *in vivo* in the  
276 phenotypically normal mouse *TgFD9*.

277 All animal experiments were designed with a commitment to minimizing both the number of mice  
278 and their suffering. We designed our preclinical animal trial based on the published  
279 recommendations<sup>87</sup>. To calculate appropriate sample sizes for the study, we performed a power  
280 analysis using the data generated from the previous kinetin efficacy study<sup>56</sup>. Thus, for statistical  
281 validity, we used at least n = 8 mice for phenotypic assessments, n = 5 mice for histological analysis  
282 of the DRG, and n = 4 to 6 mice for *ELPI* splicing and protein analysis. All analyses described in  
283 this study were conducted using animal samples from multiple litters; therefore, each unit (animal,  
284 cage, litter) represents a biological replicate. The numbers were not altered during the course of  
285 the study. The primary endpoints were predefined in advance based on our previous data<sup>56,59,64</sup>.  
286 All data were included, and the criteria were established prospectively. Animals were assigned  
287 randomly to the vehicle- or PTC258- group using a randomization system devised by the MGH  
288 Biostatistics Center. The system consists of a box containing cards with either ‘vehicle diet’,  
289 ‘special diet 0.002%’ or ‘special diet 0.004%’ in random order, and animals were randomly  
290 assigned to the appropriate group by drawing a card. Investigators conducting the experiments  
291 were blind to genotype and treatment category.

292

293 **Animals**

294 The generation of the *TgFD9* mouse line carrying the human *ELP1* transgene with the  
295 IVS20+6T>C mutation can be found in Hims et al.<sup>62</sup>. Descriptions of the original targeting vector  
296 used to generate the *Elp1<sup>fllox</sup>* allele and the strategy to generate the *Elp1<sup>Δ20</sup>* allele have been  
297 previously published<sup>88,89</sup>. To generate the experimental *TgFD9; Elp1<sup>Δ20/fllox</sup>* mouse, we crossed the  
298 *TgFD9* transgenic mouse heterozygous for the *Elp1<sup>fllox</sup>* allele (*TgFD9<sup>+/-</sup>; Elp1<sup>fllox/+</sup>*) with each other.  
299 Pups were genotyped to identify those homozygotes for both the *TgFD9* transgene and  
300 the *Elp1<sup>fllox</sup>* allele (F1: *TgFD9<sup>+/+</sup>; Elp1<sup>fllox/fllox</sup>*). These animals were then crossed with the mouse  
301 line heterozygous for the *Elp1<sup>Δ20</sup>* allele (*Elp1<sup>Δ20/+</sup>*) to generate the FD mouse *TgFD9; Elp1<sup>Δ20/fllox</sup>*  
302 (F2). Controls are littermates of the FD mice that carry the transgene but are phenotypically normal  
303 because they express the endogenous *Elp1* gene (*TgFD9<sup>+/-</sup>; Elp1<sup>+/+</sup>*, *TgFD9<sup>+/-</sup>; Elp1<sup>fllox/+</sup>* or  
304 *TgFD9<sup>+/-</sup>; Elp1<sup>Δ20/+</sup>*). The expected Mendelian ratio of *TgFD9; Elp1<sup>Δ20/fllox</sup>* mouse using this  
305 breeding scheme was 1 in 2 (50%). However, since only about 60% of *TgFD9; Ikbkap<sup>Δ20/fllox</sup>* mice  
306 survive postnatally<sup>64</sup>, the actual ratio was 1:7 (28/184; 13%) for the vehicle-treated mice, 1:5  
307 (28/125; 18.3%) for the 0.002% PTC258-treated mice and 1:4 (30/109; 21.6%) for the 0.004%  
308 PTC258-treated mice. Control and FD mice have a mixed background, including C57BL/6J and  
309 C57BL/6N. All the mice enrolled in the study were negative for the rd8 mutation.  
310 The mice were housed in the animal facility at Massachusetts General Hospital (Boston, MA),  
311 provided with access to food and water ad libitum, and maintained on a 12-hour light/dark cycle.  
312 All experimental protocols were approved by the Institutional Animal Care and Use Committee of  
313 the Massachusetts General Hospital and were in accordance with NIH guidelines.  
314 For routine genotyping of progeny, genomic DNA was prepared from tail biopsies, and PCR was  
315 carried out using the following primers - forward, 5`-TGATTGACACAGACTCTGGCCA-3`;  
316 reverse, 5`-CTTTCCTCTGAAATTACAGGAAG-3`- to discriminate the *Elp1* alleles and the

317 primers - forward 5'-GCCATTGTACTGTTTGCGACT-3'; reverse, 5'-  
318 TGAGTGTTCACGATTCTTTCTGC-3'- to detect the *TgFD9* transgene.

319  
320 **Synthesis of PTC258 (2-[(2S)-2-Aminopropyl]-5-chloro-3-methyl-N-(2-  
321 thienylmethyl)thieno[3,2-b]pyridin-7-amine)**

322 PTC258 was manufactured by PTC Therapeutic, Inc. All materials used in the studies were >99%  
323 pure, as assessed by analytical methods including NMR, HPLC and LC/MS.

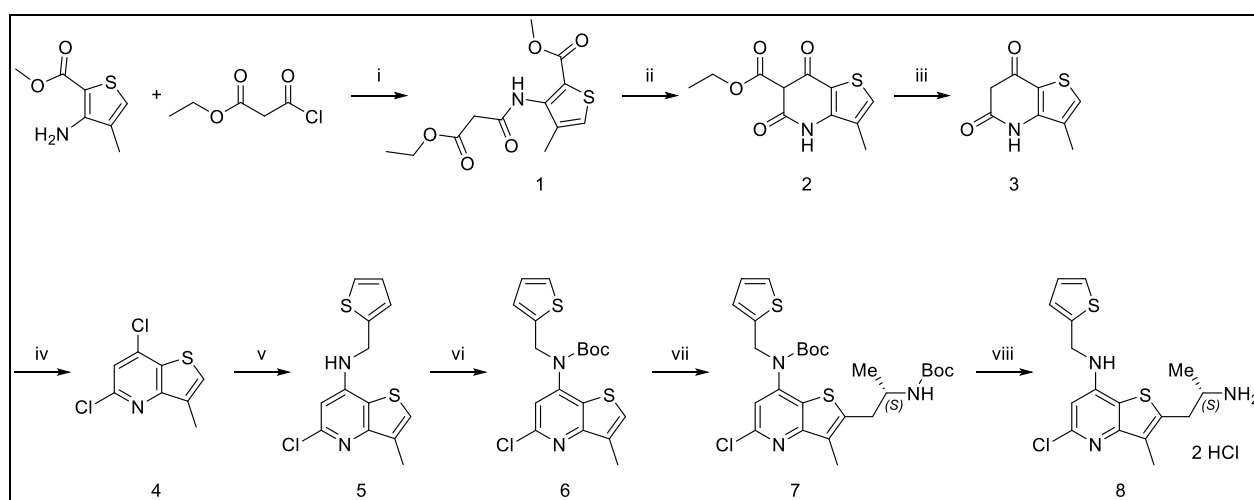

324  
325 Reagents and conditions: (i) triethylamine, dichloromethane, 0°C to rt, 3 h, 98.4%; (ii) Na, EtOH,  
326 reflux, 12 h, 57.1%; (iii) NaOH, H<sub>2</sub>O, reflux, overnight, 75.3%; (iv) POCl<sub>3</sub>, N, N-dimethylaniline,  
327 reflux, overnight, 78%; (v) 2-thiophenemethylamine, DMSO, 100°C, 24 h, 42.7%; (vi) Boc<sub>2</sub>O,  
328 DMAP, DCM, rt, overnight, 74.8%; (vii) LDA, tert-butyl (4S)-4-methyl-2,2-dioxo-  
329 oxathiazolidine-3-carboxylate, -78°C, 20 min; then aq. citric acid, rt, 1 h, 78.4%; (viii) HCl in  
330 dioxane, rt, 15 min, 83%.

331 (1) Methyl 3-[(3-ethoxy-3-oxo-propanoyl)amino]-4-methyl-thiophene-2-carboxylate. To a  
332 solution of methyl 3-amino-4-methyl-thiophene-2-carboxylate (25.0 g, 146 mmol, 1.0 eq.) in  
333 dichloromethane (300 mL) was added triethylamine (40.7 mL, 292 mmol, 2.0 eq.). The mixture

334 was cooled to 0°C and ethyl 3-chloro-3-oxo-propanoate (26.4 g, 175 mmol, 1.2 eq.) was slowly  
335 dropped in. After that, the mixture was stirred for 3 h at room temperature and quenched with brine  
336 (100 mL). The mixture was separated, and the aqueous phase was extracted with DCM (2 x 100  
337 mL). The organic phase was dried over Na<sub>2</sub>SO<sub>4</sub> and filtered. The filtrate was concentrated to give  
338 methyl 3-[(3-ethoxy-3-oxo-propanoyl)amino]-4-methyl-thiophene-2-carboxylate (41.0 g, 98.4%  
339 yield) as a brown oil, which was used in the next step without further purification. <sup>1</sup>H NMR  
340 (chloroform-d) δ: 9.77 (br s, 1 H), 7.17 (d, J=0.8 Hz, 1 H), 4.31 (q, J=7.2 Hz, 2 H), 3.89 (s, 3H),  
341 3.54 (s, 2H), 2.20 (d, J=0.8 Hz, 3H), 1.35 (t, J=7.2 Hz, 3 H).

342 (2) Ethyl 3-methyl-5,7-dioxo-4H-thieno[3,2-b]pyridine-6-carboxylate. At room temperature,  
343 sodium (1.65 g, 71.8 mmol, 0.5 eq.) was carefully dissolved in ethanol (150 mL) to give sodium  
344 ethanoate solution, which was mixed with methyl 3-[(3-ethoxy-3-oxo-propanoyl)amino]-4-  
345 methyl-thiophene-2-carboxylate (41.0 g, 144 mmol, 1.0 eq.). The mixture was refluxed for 12 h  
346 and then cooled to room temperature. Precipitation was formed and filtered. The filter cake was  
347 collected and dried in vacuo to give ethyl 3-methyl-5,7-dioxo-4H-thieno[3,2-b]pyridine-6-  
348 carboxylate (20.8 g, 57.1% yield) as a pale brown solid. MS m/z 254.1 [M+H]<sup>+</sup>; <sup>1</sup>H NMR (D<sub>2</sub>O)  
349 δ: 7.16 (s, 1H), 4.18 (q, J=7.2 Hz, 2 H), 2.07 (s, 3H), 1.22 (t, J=7.2 Hz, 3H).

350 (3) 3-Methyl-4H-thieno[3,2-b]pyridine-5,7-dione. To a suspension of ethyl 3-methyl-5,7-dioxo-  
351 4H-thieno[3,2-b]pyridine-6-carboxylate (20.8 g, 82.1 mmol, 1.0 eq.) in water (200 mL) was added  
352 sodium hydroxide (5.97 g, 148 mmol, 1.8 eq.). The mixture was refluxed overnight, then cooled  
353 to room temperature. The pH was adjusted to 4~5 with conc HCl. Precipitation was formed and  
354 filtered. The filter cake was collected and dried in vacuo to give 3-methyl-4H-thieno[3,2-  
355 b]pyridine-5,7-dione (11.2 g, 75.3% yield) as a pale brown solid. MS m/z 182.1 [M+H]<sup>+</sup>; <sup>1</sup>H NMR  
356 (DMSO-d) δ: 11.41 (br s, 2H), 7.45 (s, 1H), 5.62 (s, 1H), 2.24 (s, 3H).



357 (4) 5,7-Dichloro-3-methyl-thieno[3,2-b]pyridine. A mixture of 3-methyl-4H-thieno[3,2-  
358 b]pyridine-5,7-dione (5.0 g, 28 mmol, 1.0 eq.), POCl<sub>3</sub> (60 mL), and N,N-dimethylaniline (1.5 mL,  
359 12 mmol, 0.42 eq.) was refluxed overnight under N<sub>2</sub> and then cooled. The mixture was  
360 concentrated via rotovap to remove most POCl<sub>3</sub>, then poured into ice water (20 mL). The  
361 precipitate was collected by filtration, washed twice with water, dried and purified by silica gel  
362 chromatography with dichloromethane to give 5,7-dichloro-3-methyl-thieno[3,2-b]pyridine (5.0  
363 g, 78% yield) as a yellow solid. MS m/z 218.1, 220.0 [M+H]<sup>+</sup>; <sup>1</sup>H NMR (chloroform-d) δ: 7.50  
364 (d, J=0.8 Hz, 1 H), 7.37 (s, 1H), 2.52 (d, J=0.8 Hz, 3H).

365 (5) 5-Chloro-3-methyl-N-(2-thienylmethyl)thieno[3,2-b]pyridin-7-amine. A mixture of 5,7-  
366 dichloro-3-methyl-thieno[3,2-b]pyridine (1.0 g, 4.59 mmol, 1.00 eq.) and 2-  
367 thiophenemethylamine (5.2 g, 45.9 mmol, 10.0 eq.) in dimethyl sulfoxide (4.0 mL) was stirred at  
368 100°C for 24 h, then cooled to room temperature, diluted with ethyl acetate and washed with water  
369 and brine, dried and evaporated. The residue was purified over silica with ethyl acetate and hexanes  
370 (5 to 35% gradient) to give 5-chloro-3-methyl-N-(2-thienylmethyl)thieno[3,2-b]pyridin-7-amine  
371 (0.58 g, 42.7% yield). MS m/z 295.1, 297.1 [M+H]<sup>+</sup>; <sup>1</sup>H NMR (chloroform-d) δ: 7.32-7.30 (m,  
372 1H), 7.26 (d, J=1.2 Hz, 1 H), 7.11-7.10 (m, 1H), 7.05-7.03 (m, 1H), 6.56 (s, 1H), 4.74-4.69 (m,  
373 3H), 2.49 (s, 3H).

374 (6) tert-Butyl N-(5-chloro-3-methyl-thieno[3,2-b]pyridin-7-yl)-N-(2-thienylmethyl)carbamate. To  
375 a solution of 5-chloro-3-methyl-N-(2-thienylmethyl)thieno[3,2-b]pyridin-7-amine (0.58 g, 1.96  
376 mmol, 1.0 eq.) and Boc<sub>2</sub>O (0.86 g, 3.92 mmol, 2.0 eq.) in dichloromethane (8.0 mL) was added  
377 DMAP (0.24 g, 1.96 mmol, 1.0 eq.) portion wise. Upon completion the solution was diluted with  
378 ethyl acetate and washed with water and brine, dried with Na<sub>2</sub>SO<sub>4</sub> and concentrated. The residue  
379 was purified by column chromatography with ethyl acetate and hexanes (5 to 35% gradient) to

380 furnish tert-butyl N-(5-chloro-3-methyl-thieno[3,2-b]pyridin-7-yl)-N-(2-thienylmethyl)carbamate  
381 (0.58 g, 74.8% yield). MS m/z 395.1, 397.1 [M+H]<sup>+</sup>; <sup>1</sup>H NMR (chloroform-d) δ: 7.41 (s, 1 H),  
382 7.24 (dd, J=1.0 Hz, 1 H), 7.06 (s, 1 H), 6.89 (dd, J=1.0 Hz, 1 H), 6.81 (d, J=1.0 Hz, 1 H), 5.07 (s,  
383 2 H), 2.51 (d, J=1.1 Hz, 3 H), 1.47 (s, 9 H).

384 (7) tert-Butyl N-[2-[(2S)-2-(tert-butoxycarbonylamino)propyl]-5-chloro-3-methyl-thieno[3,2-  
385 b]pyridin-7-yl]-N-(2-thienylmethyl)carbamate. To a solution of tert-butyl N-(5-chloro-3-methyl-  
386 thieno[3,2-b]pyridin-7-yl)-N-(2-thienylmethyl)carbamate (0.58 g, 1.46 mmol, 1.0 eq.) in THF (6.0  
387 mL) at -78°C was added 2.0 M LDA in THF/heptane/ethylbenzene (0.88 mL, 1.76 mmol, 1.2 eq.)  
388 dropwise. After 15 min a solution of tert-butyl (4S)-4-methyl-2,2-dioxo-oxathiazolidine-3-  
389 carboxylate (0.42 g, 1.76 mmol, 1.2 eq.) in THF (8.0 mL) was added. The yellow mixture was  
390 stirred at -78°C for 20 min then quenched with 1.0 M citric acid, followed by stirring at rt for 1  
391 hour. The mixture was diluted with ethyl acetate, washed with water and brine, dried over sodium  
392 sulfate and evaporated. The residue was purified over silica gel with ethyl acetate and hexanes (3  
393 to 30% gradient) to give tert-butyl N-[2-[(2S)-2-(tert-butoxycarbonylamino)propyl]-5-chloro-3-  
394 methyl-thieno[3,2-b]pyridin-7-yl]-N-(2-thienylmethyl)carbamate (0.63 g, 78.4% yield). MS m/z  
395 553.0, 555.0 [M+H]<sup>+</sup>, <sup>1</sup>H NMR (chloroform-d) δ: 7.22 (d, J=5.3 Hz, 1 H), 6.99 (s, 1 H), 6.86 (dd,  
396 J=5.0, 3.5 Hz, 1 H), 6.78 (d, J=2.9 Hz, 1 H), 5.02 (dd, J=1.0 Hz, 2 H), 4.46 (br s, 1 H), 4.01 (br s,  
397 1 H), 3.07 - 3.16 (m, 1 H), 2.93 - 3.07 (m, 1 H), 2.41 (s, 3 H), 1.45 (s, 18 H), 1.14 (d, J=6.7 Hz, 3  
398 H).

399 (8) 2-[(2S)-2-Aminopropyl]-5-chloro-3-methyl-N-(2-thienylmethyl)thieno[3,2-b]pyridin-7-  
400 amine, dihydrochloride. To a reaction tube with tert-butyl N-[2-[(2S)-2-(tert-  
401 butoxycarbonylamino)propyl]-5-chloro-3-methyl-thieno[3,2-b]pyridin-7-yl]-N-(2-  
402 thienylmethyl)carbamate (0.63 g, 1.15 mmol) was added hydrochloric acid (4.0 M) in dioxane (6.0

403 mL). After 15 minutes white precipitate appeared and UPLC confirmed the reaction was complete.  
404 To the mixture was added diethyl ether (15.0 mL). The precipitate was filtered. The filter cake was  
405 collected and dried under vacuum to furnish 2-[(2S)-2-aminopropyl]-5-chloro-3-methyl-N-(2-  
406 thienylmethyl)thieno[3,2-b]pyridin-7-amine, dihydrochloride (0.40 g, 83% yield). MS m/z 352.1,  
407 354.1 [M+H]<sup>+</sup>, <sup>1</sup>H NMR (MeOH-d<sub>4</sub>) δ: 7.38 (dd, J=5.2, 1.1 Hz, 1 H), 7.18 (d, J=2.8 Hz, 1 H),  
408 7.10 (s, 1 H), 7.01 (dd, J=5.0, 3.5 Hz, 1 H), 4.97 (s, 2 H), 3.60 - 3.72 (m, 1 H), 3.37 - 3.44 (m, 1  
409 H), 3.24 - 3.30 (m, 1 H), 2.47 (s, 3 H), 1.39 (d, J=6.6 Hz, 3 H).

410

### 411 **Catwalk analysis in mice**

412 The Catwalk is an automated gait analysis system used to assess motor function and coordination  
413 in rodents. In brief, animals were allowed to walk on a green-illuminated glass platform contrasted  
414 by a red-illuminated ceiling, to allow for momentarily highlight of the footprints. A high-speed  
415 camera under the platform recorded movement and transferred the data to a computer, where paw  
416 prints were analyzed with the software CatWalk XT 10.6 (Noldus Inc., The Netherlands). During  
417 the data acquisition, each mouse was placed on the walkway in a dark environment and could walk  
418 freely in both directions with a minimum level of external disturbing factors. Experimental  
419 sessions typically lasted for 15-25 min. After data acquisition, each mouse was returned to its own  
420 home-cage, in order to reduce habituation of the animals to the environment and the appearance  
421 of unwanted behaviors (e.g. sniffing, rearing and sitting). Each mouse was tested on two  
422 consecutive days. Before the testing, the mice were allowed to acclimate to the experimental room  
423 for at least thirty minutes. Each experimental session lasted until 5 compliant runs were achieved.  
424 Compliance was defined as less than 60% variation in speed throughout the run with a minimum  
425 run duration of 0.5 seconds and a maximum run duration of 5 seconds. Any mouse having not

426 completed five compliant runs in 25 minutes was removed from the apparatus and returned to the  
427 cage. The total compliant runs recorded from vehicle-treated control mice (n=20), vehicle-treated  
428 FD mice (n=16), 0.002% PTC258-treated FD (n=16) mice and 0.004% PTC258-treated FD mice  
429 (n=9) were respectively 32, 26, 25, and 15. The paw positions were first automatically labeled by  
430 the CatWalk system, then revised by an experienced observer. The minimum green intensity  
431 threshold was set at 0.10, the red ceiling light set at 17.7, the green walkway light set at 16.5, and  
432 the camera gain was set at 20.

433

#### 434 **Spectral-Domain Optical coherence tomography (SD-OCT)**

435 For *in vivo* imaging of the retina, mice were anesthetized by placing them in a mobile  
436 isoflurane induction chamber, and the vaporizer was set to an isoflurane concentration of 2% at 2  
437 L/min O<sub>2</sub>. The mice's pupils were dilated using 2.5% phenylephrine and 1% tropicamide. 0.5%  
438 proparacaine was used as a topical anesthetic during the procedure. SD-OCT imaging was  
439 performed using a Leica EnvisuR2210 OCT machine. Measurements were made at 100 μm from  
440 the optic nerve for the central retina and 1.5 mm from the optic nerve for the peripheral retina.  
441 Control and FD mice were analyzed at 3, 6, 12, and 18 months of age. Linear B-scans of the central  
442 and peripheral retina were performed, and the thickness of the RNFL and GCIPL layers were  
443 manually measured using Bioptigen InVivoView Clinc software. Each OCT image comprises 100  
444 B-scans, with each B-scan consisting of 1000 A-scans. We then analyzed four representative  
445 images per mouse, two for each eye, and included measurements from both eyes.

446

#### 447 **DRG immunohistochemistry**

448 After euthanasia, L3 DRGs were dissected and fixed in 4% paraformaldehyde (PFA) overnight;  
449 afterward, the DRGs were washed for 24 h in PBS. The DRGs were then incubated in 30% sucrose,  
450 mounted in OCT compound, and stored at  $-80^{\circ}\text{C}$ . 16  $\mu\text{m}$  serial cryosections that spanned the  
451 whole ganglia were performed. Proprioceptive neurons were labeled with parvalbumin (PV;  
452 Synaptic System, guinea pig, 1:2000), and whole sensory neurons were labeled with fluorescent  
453 NueN staining (NueN; Chemicon International, mouse 1:500). We calculated the volume of the  
454 DRG by using ImageJ to measure, in every section, the area that was occupied by neuronal cell  
455 bodies and then multiplying the area of each section by its thickness (16  $\mu\text{m}$ ) to find the section  
456 volume. The sum of all the section volumes provided the DRG volume, expressed in  $\text{mm}^3$ <sup>62</sup>. We  
457 counted the number of total proprioceptive neurons per DRG by counting the number of  
458 proprioceptive neurons in every other section and then multiplying the average by the number of  
459 sections of each DRG.

460

#### 461 **Retinal whole mounting and RGC counting**

462 Staining and RGC counting of retinal whole mounts was performed according to the method  
463 previously described by Ueki et al.<sup>59,84,90,91</sup>. Briefly, fixation of the eyes was performed at room  
464 temperature for 1 hour in 4% PFA, and the eyes were marked with a yellow tissue marking dye on  
465 the temporal surface. After fixation, retinae were isolated, with each temporal retina marked with  
466 a small cut. Relaxing cuts in the spherical retina were made on all four corners. Nonspecific  
467 binding was blocked by incubating with an animal-free blocker containing 0.5% Triton X-100  
468 overnight at  $4^{\circ}\text{C}$ , and an anti-RPBMS antibody was applied overnight at  $4^{\circ}\text{C}$ . Retinae were  
469 incubated with secondary antibodies for 1 hour at room temperature and mounted on slides. Images  
470 were acquired using a LeicaDMi8 epifluorescent microscope and MetaMorph 4.2 acquisition

471 software (Molecular Devices, San Jose, CA). Whole scans of complete flat-mount samples were  
472 obtained at 20X magnification using scan stage and autofocus. The total retinal area across the  
473 entire scan was approximately 14 mm<sup>2</sup>. With ImageJ software, the number of RPBMS+ cells were  
474 measured at 1x1 mm square at 1 mm from the ONH at superior, inferior, temporal, and nasal  
475 hemispheres<sup>59,84</sup>. If a specific square area was damaged due to rips or folds in the retina, we have  
476 counted the RGCs in an adjacent undamaged area. Moreover, we have intentionally avoided  
477 counting RGCs in the edges of the retina because these areas usually have higher cell counts due  
478 to the downward pressure caused by the flattening cuts to the retina. We analyzed approximately  
479 30% of the retina from one eye of each mouse. The investigator conducting the analysis was  
480 blinded to the genotype.

481

#### 482 **RNA isolation and RT-PCR analysis of full-length and mutant *ELPI* transcripts in mouse** 483 **tissues**

484 Mice were euthanized, and brain, DRG, liver, lung, kidney, and heart tissues were removed and  
485 snap-frozen in liquid nitrogen. Tissues were homogenized in ice-cold TRI reagent (Molecular  
486 Research Center, Inc., Cincinnati, OH, USA), using a TissueLyser (Qiagen). Total RNA was  
487 extracted using the TRI reagent procedure provided by the manufacturer. The yield, purity, and  
488 quality of the total RNA for each sample were determined using a Nanodrop ND-1000  
489 spectrophotometer. According to the manufacturer's protocol, reverse transcription was performed  
490 using 1 µg of total RNA, Random Primers (Promega), and Superscript III reverse transcriptase  
491 (Invitrogen).

492 RT-PCR was performed using the cDNA equivalent of 100 ng of starting RNA in a 30-µl reaction,  
493 using GoTaq® green master mix (Promega) and 30 amplification cycles (94°C for 30 s, 58°C for

494 30 s, 72°C for 30 s). Human-specific *ELP1* primers - forward, 5` - CCTGAGCAG CAATCATGTG  
495 -3; reverse, 5` - TACATGGTCTTCGTGACATC-3` - were used to amplify human *ELP1* isoforms  
496 expressed from the transgene. PCR products were separated on 1.5% agarose gels and stained with  
497 ethidium bromide. The relative amounts of WT and mutant ( $\Delta 20$ ) *ELP1* spliced isoforms in a  
498 single PCR were determined using ImageJ and the integrated density value for each band as  
499 previously described<sup>62,63</sup>. The relative proportion of the WT isoform detected in a sample was  
500 calculated as a percentage.

501

### 502 **RT-qPCR analysis of full-length and mutant *ELP1* transcripts in mouse tissues**

503 Mice were euthanized and brain, liver, lung, kidney, heart and skin tissues were removed and snap  
504 frozen in liquid nitrogen. Tissues were homogenized in ice-cold QIAzol Lysis Reagent (Qiagen),  
505 using Qiagen TissueLyser II (Qiagen). Total RNA was extracted using the QIAzol reagent  
506 procedure provided by the manufacturer. The yield, purity and quality of the total RNA for each  
507 sample were determined using a Nanodrop ND-1000 spectrophotometer. Full-length and mutant  
508 *ELP1* mRNA expression was quantified by quantitative real-time PCR (RT-qPCR) analysis using  
509 CFX384 Touch Real-Time PCR Detection System (BioRad). Reverse transcription and qPCR  
510 were carried out using One Step RT-qPCR (BioRad) according to the manufacturer's  
511 recommendations. The mRNA levels of full-length *ELP1*, mutant  $\Delta 20$  *ELP1* and *GAPDH* were  
512 quantified using Taqman-based RT-qPCR with a cDNA equivalent of 25 ng of starting RNA in a  
513 20- $\mu$ l reaction. To amplify the full-length *ELP1* isoform, FL *ELP1* primers forward, 5` -  
514 GAGCCCTGGTTTTAGCTCAG -3`; reverse, 5` - CATGCATTCAAATGCCTCTTT -3` and FL  
515 *ELP1* probe 5` - TCGGAAGTGGTTGGACAAACTTATGTTT-3` were used. To amplify the  
516 mutant ( $\Delta 20$ ) *ELP1* spliced isoforms,  $\Delta 20$  *ELP1* primers forward, 5` -

517 CACAAAGCTTGTATTACAGACT -3`; reverse, 5`- GAAGGTTTCCACATTTCCAAG -3` and  
518  $\Delta 20$  *ELP1* probe 5`- CTCAATCTGATTTATGATCATAACCCTAAGGTG -3` were used to  
519 amplify the mutant ( $\Delta 20$ ) *ELP1* spliced isoforms. The *ELP1* forward and reverse primers were  
520 each used at a final concentration of 0.4  $\mu$ M. The *ELP1* probes were used at a final concentration  
521 of 0.15  $\mu$ M. Mouse *GAPDH* mRNA was amplified using 20X gene expression PCR assay (Life  
522 Technologies, Inc.). RT-qPCR was carried out at the following temperatures for indicated times:  
523 Step 1: 48°C (15 min); Step 2: 95°C (15 min); Step 3: 95°C (15 sec); Step 4: 60°C (1 min); Steps  
524 3 and 4 were repeated for 39 cycles. The Ct values for each mRNA were converted to mRNA  
525 abundance using actual PCR efficiencies. *ELP1* FL and  $\Delta 20$  mRNAs were normalized to *GAPDH*  
526 and vehicle controls and plotted as fold change compared to vehicle treatment. Data were analyzed  
527 using the SDS software.

528

### 529 **ELP1 protein quantification in human fibroblasts using Homogeneous Time Resolved** 530 **Fluorescence (HTRF) assay**

531 GM04589 patient fibroblasts were thawed and incubated in Dulbecco's Modified Eagle Medium  
532 (DMEM-10%) fetal bovine (FBS) for 72 hours. Cells were trypsinized, counted, and resuspended  
533 to a concentration of 50,000 cells/ml in DMEM-10% FBS. Aliquots (199  $\mu$ l) of the cell  
534 suspensions were plated at 10,000 cells per well in a 96-well microtiter plate and incubated for 3  
535 to 5 hours. Two sets of control wells were included in each plate, 6 wells received DMSO at a final  
536 concentration of 0.5% and 6 wells were filled with cell culture medium without cells and served  
537 as blank wells. PTC258 was serially diluted 3.16-fold (i.e., half log-10 dilution scheme) in 100%  
538 DMSO to generate a 7-point concentration curve. A 1  $\mu$ l aliquot of 200x compound solution was  
539 transferred to cell-containing wells, and cells were incubated for 48 hours in a cell culture incubator



540 (37°C, 5% CO<sub>2</sub>, 100% relative humidity). Three independent samples were set up for each  
541 compound concentration. After 48 hours, the supernatant was removed from the cells and 50 µl of  
542 the 1x LB4 (lysis buffer), containing protease inhibitors, was added to the cells and incubated with  
543 shaking at room temperature for 1 hour. A 36 µl aliquot of this lysate was subsequently transferred  
544 to a 384 well plate containing 4 µl of the antibody solution (1:50 dilution of anti-ELP1 d2(CisBio)  
545 and anti-ELP1 K(CisBio) in detection buffer). The 384-well plate was then centrifuged for 1  
546 minute to bring the solutions to the bottom of the plate and incubated overnight at 4°C.  
547 Fluorescence emission for each well of the plate at 665 nm (acceptor) and 620 nm (donor) was  
548 measured on the EnVision plate reader (Perkin Elmer).

549

#### 550 **Meso Scale Discovery (MSD) immunoassay for ELP1 protein quantification in mouse tissues**

551 Tissue samples were collected in Safe-Lock tubes (Eppendorf), snap-frozen in liquid nitrogen,  
552 weighed and homogenized on the TissueLyzer II (Qiagen) in RIPA buffer (Tris-HCl 50 mM, pH  
553 7.4; NaCl 150 mM; NP-40 1%; sodium deoxycholate 0.5%; SDS 0.1%) containing a cocktail of  
554 protease inhibitors (Roche) at a tissue-weight to RIPA buffer volume of 50 mg/ml. The samples  
555 were then centrifuged for 20 min at 14,000 x g in a microcentrifuge. The homogenates were  
556 transferred to a 96-well plate and were diluted in RIPA buffer to ~1 mg/ml for ELP1-MSD and ~  
557 0.5 mg/mL for total protein measurement using the BCA protein assay (Pierce). Samples were run  
558 in duplicate and averaged. The MSD sandwich immunoassay was performed according to the  
559 manufacturer's (Meso Scale Diagnostics) protocol. 25 µl of the diluted tissue homogenates were  
560 transferred to a 96-well standard MSD plate coated with 0.5 µg/ml of capture antibody, rabbit  
561 monoclonal anti-ELP1 antibody from Abcam #ab179437, in PBS and incubated overnight at 4°C.  
562 The primary detection antibody, mouse anti-IKAP (33) from Santa Cruz Biotechnology #SC-

563 136412, was used at 0.5  $\mu\text{g/ml}$  and incubated for 2-3 hours at room temperature. Sulfo-Tag  
564 antibody, Goat anti-mouse from MSD #R32AC-1, was used at 0.5  $\mu\text{g/ml}$  and incubated for 1 hour  
565 at room temperature. Sector Imager S600 (Meso Scale Diagnostics) was used to read the plates.  
566 The level of ELP1 in the tissues from kinetin-treated mice was normalized to the ELP1 level in  
567 the control tissues and plotted as fold change over controls.

568

### 569 **Statistical analysis**

570 We performed an unpaired Student's t-test using GraphPad Prism 7 software to determine the  
571 statistical differences between two groups. Every time one group was compared to more than  
572 another group, we applied the false discovery rate (FDR) correction and reported the FDR-adjusted  
573 *P* values. Every time different treatment groups were compared to the same control group, we  
574 applied one-way ANOVA with Dunnett's multiple comparison test and reported the adjusted *P*  
575 values. For all experiments, a criterion  $\alpha$  level was set at 0.05.

576

### 577 **Conflict of Interest**

578 The authors declare competing financial interests.

579 Jana Narasimhan, Vijayalakshmi Gabbeta, Shivani Grover, Amal Dakka, Anna Mollin, Stephen  
580 Jung, Xin Zhao, Nanjing Zhang, Sophie Zhang, Michael Arnold, Matthew G. Woll, Nikolai A.  
581 Naryshkin, Marla Weetall are/were employees of PTC Therapeutics, Inc., a biotechnology  
582 company. In connection with such employment, the authors receive salary, benefits and stock-  
583 based compensation, including stock options, restricted stock, other stock-related grants, and the  
584 right to purchase discounted stock through PTC's employee stock purchase plan.

585 Funding: Research support from PTC Therapeutics, Inc. (S.A.S. and E.M.).

586 Personal financial interests: Susan A. Slaughaupt is a paid consultant to PTC Therapeutics and  
587 is an inventor on several U.S. and foreign patents and patent applications assigned to the  
588 Massachusetts General Hospital, including U.S Patents 8,729,025 and 9,265,766, both entitled  
589 “Methods for altering mRNA splicing and treating familial dysautonomia by administering  
590 benzyladenine,” filed on August 31, 2012 and May 19, 2014 and related to use of kinetin; and U.S.  
591 Patent 10,675,475 entitled, “Compounds for improving mRNA splicing” filed on July 14, 2017  
592 and related to use of BPN-15477.

593 Elisabetta Morini, Vijayalakshmi Gabbeta, Amal Dakka, Nikolai A. Naryshkin, and Susan A.  
594 Slaughaupt are inventors on an International Patent Application Number PCT/US2021/012103,  
595 assigned to Massachusetts General Hospital and PTC Therapeutics entitled "RNA Splicing  
596 Modulation" related to use of BPN-15477 in modulating splicing.

597 All other authors declare no competing interests.

598

## 599 **Acknowledgments**

600 We thank Dr. Horacio Kaufmann at the Dysautonomia Treatment and Evaluation Center at New  
601 York University Medical School and Dr. Frances Lefcort at Montana State University for their  
602 long-standing collaboration and helpful discussions. We are also grateful to Drs. Ioannis Dragatsis  
603 and Paula Dietrich at the University of Tennessee for the gift of the *Elp1*<sup>flox/+</sup> and *Elp1*<sup>Δ20/+</sup> mice  
604 and their collaborative effort to generate the FD phenotypic mouse model. This work was  
605 supported by National Institutes of Health (NIH) grants (R37NS095640 to S.A.S.).

606

## 607 **References**

- 608 1. Hawkes, N.A., Otero, G., Winkler, G.S., Marshall, N., Dahmus, M.E., Krappmann, D.,  
609 Scheidereit, C., Thomas, C.L., Schiavo, G., Erdjument-Bromage, H., et al. (2002). Purification and  
610 characterization of the human elongator complex. *J. Biol. Chem.* 277, 3047-3052.  
611 10.1074/jbc.M110445200.
- 612 2. Otero, G., Fellows, J., Li, Y., de Bizemont, T., Dirac, A.M., Gustafsson, C.M., Erdjument-  
613 Bromage, H., Tempst, P., and Svejstrup, J.Q. (1999). Elongator, a multisubunit component of a  
614 novel RNA polymerase II holoenzyme for transcriptional elongation. *Mol. Cell* 3, 109-118.
- 615 3. Li, Y., Takagi, Y., Jiang, Y., Tokunaga, M., Erdjument-Bromage, H., Tempst, P., and  
616 Kornberg, R.D. (2001). A multiprotein complex that interacts with RNA polymerase II elongator.  
617 *J. Biol. Chem.* 276, 29628-29631. 10.1074/jbc.C100274200.
- 618 4. Kim, J.H., Lane, W.S., and Reinberg, D. (2002). Human Elongator facilitates RNA  
619 polymerase II transcription through chromatin. *Proc. Natl. Acad. Sci. U. S. A.* 99, 1241-1246.  
620 10.1073/pnas.251672198.
- 621 5. Pokholok, D.K., Hannett, N.M., and Young, R.A. (2002). Exchange of RNA polymerase  
622 II initiation and elongation factors during gene expression in vivo. *Mol. Cell* 9, 799-809.
- 623 6. Creppe, C., Malinouskaya, L., Volvert, M.L., Gillard, M., Close, P., Malaise, O., Laguesse,  
624 S., Cornez, I., Rahmouni, S., Ormenese, S., et al. (2009). Elongator controls the migration and  
625 differentiation of cortical neurons through acetylation of alpha-tubulin. *Cell* 136, 551-564.  
626 10.1016/j.cell.2008.11.043.
- 627 7. Svejstrup, J.Q. (2007). Elongator complex: how many roles does it play? *Curr. Opin. Cell*  
628 *Biol.* 19, 331-336. 10.1016/j.ceb.2007.04.005.

- 629 8. Esberg, A., Huang, B., Johansson, M.J., and Bystrom, A.S. (2006). Elevated levels of two  
630 tRNA species bypass the requirement for elongator complex in transcription and exocytosis. *Mol.*  
631 *Cell* 24, 139-148. 10.1016/j.molcel.2006.07.031.
- 632 9. Yoshida, M., Kataoka, N., Miyauchi, K., Ohe, K., Iida, K., Yoshida, S., Nojima, T., Okuno,  
633 Y., Onogi, H., Usui, T., et al. (2015). Rectifier of aberrant mRNA splicing recovers tRNA  
634 modification in familial dysautonomia. *Proc. Natl. Acad. Sci. U. S. A.* 112, 2764-2769.  
635 10.1073/pnas.1415525112.
- 636 10. Goffena, J., Lefcort, F., Zhang, Y., Lehrmann, E., Chaverra, M., Felig, J., Walters, J.,  
637 Buksch, R., Becker, K.G., and George, L. (2018). Elongator and codon bias regulate protein levels  
638 in mammalian peripheral neurons. *Nature communications* 9, 889. 10.1038/s41467-018-03221-z.
- 639 11. Karlsborn, T., Tukenmez, H., Chen, C., and Bystrom, A.S. (2014). Familial dysautonomia  
640 (FD) patients have reduced levels of the modified wobble nucleoside mcm(5)s(2)U in tRNA.  
641 *Biochem. Biophys. Res. Commun.* 454, 441-445. 10.1016/j.bbrc.2014.10.116.
- 642 12. Rahl, P.B., Chen, C.Z., and Collins, R.N. (2005). Elp1p, the yeast homolog of the FD  
643 disease syndrome protein, negatively regulates exocytosis independently of transcriptional  
644 elongation. *Mol. Cell* 17, 841-853. 10.1016/j.molcel.2005.02.018.
- 645 13. Johansen, L.D., Naumanen, T., Knudsen, A., Westerlund, N., Gromova, I., Junttila, M.,  
646 Nielsen, C., Bottzauw, T., Tolkovsky, A., Westermarck, J., et al. (2008). IKAP localizes to  
647 membrane ruffles with filamin A and regulates actin cytoskeleton organization and cell migration.  
648 *J. Cell Sci.* 121, 854-864. 10.1242/jcs.013722.
- 649 14. Close, P., Hawkes, N., Cornez, I., Creppe, C., Lambert, C.A., Rogister, B., Siebenlist, U.,  
650 Merville, M.P., Slaugenhaupt, S.A., Bours, V., et al. (2006). Transcription impairment and cell

- 651 migration defects in elongator-depleted cells: implication for familial dysautonomia. *Mol. Cell* 22,  
652 521-531. 10.1016/j.molcel.2006.04.017.
- 653 15. Tourtellotte, W.G. (2016). Axon Transport and Neuropathy: Relevant Perspectives on the  
654 Etiopathogenesis of Familial Dysautonomia. *Am. J. Pathol.* 186, 489-499.  
655 10.1016/j.ajpath.2015.10.022.
- 656 16. Naftelberg, S., Abramovitch, Z., Gluska, S., Yannai, S., Joshi, Y., Donyo, M., Ben-Yaakov,  
657 K., Gradus, T., Zonszain, J., Farhy, C., et al. (2016). Phosphatidylserine Ameliorates  
658 Neurodegenerative Symptoms and Enhances Axonal Transport in a Mouse Model of Familial  
659 Dysautonomia. *PLoS Genet* 12, e1006486. 10.1371/journal.pgen.1006486.
- 660 17. Jackson, M.Z., Gruner, K.A., Qin, C., and Tourtellotte, W.G. (2014). A neuron autonomous  
661 role for the familial dysautonomia gene ELP1 in sympathetic and sensory target tissue innervation.  
662 *Development* 141, 2452-2461. 10.1242/dev.107797.
- 663 18. George, L., Chaverra, M., Wolfe, L., Thorne, J., Close-Davis, M., Eibs, A., Riojas, V.,  
664 Grindeland, A., Orr, M., Carlson, G.A., and Lefcort, F. (2013). Familial dysautonomia model  
665 reveals Ikbkap deletion causes apoptosis of Pax3+ progenitors and peripheral neurons. *Proc. Natl.*  
666 *Acad. Sci. U. S. A.* 110, 18698-18703. 10.1073/pnas.1308596110.
- 667 19. Abashidze, A., Gold, V., Anavi, Y., Greenspan, H., and Weil, M. (2014). Involvement of  
668 IKAP in peripheral target innervation and in specific JNK and NGF signaling in developing PNS  
669 neurons. *PLoS One* 9, e113428. 10.1371/journal.pone.0113428.
- 670 20. Hunnicutt, B.J., Chaverra, M., George, L., and Lefcort, F. (2012). IKAP/Elp1 is required  
671 in vivo for neurogenesis and neuronal survival, but not for neural crest migration. *PLoS One* 7,  
672 e32050. 10.1371/journal.pone.0032050.

- 673 21. Lee, G., Papapetrou, E.P., Kim, H., Chambers, S.M., Tomishima, M.J., Fasano, C.A.,  
674 Ganat, Y.M., Menon, J., Shimizu, F., Viale, A., et al. (2009). Modelling pathogenesis and  
675 treatment of familial dysautonomia using patient-specific iPSCs. *Nature* 461, 402-406.  
676 nature08320 [pii]  
677 10.1038/nature08320.
- 678 22. Lee, G., and Studer, L. (2011). Modelling familial dysautonomia in human induced  
679 pluripotent stem cells. *Philos. Trans. R. Soc. Lond. B Biol. Sci.* 366, 2286-2296.  
680 10.1098/rstb.2011.0026.
- 681 23. Zeltner, N., Fattahi, F., Dubois, N.C., Saurat, N., Lafaille, F., Shang, L., Zimmer, B.,  
682 Tchieu, J., Soliman, M.A., Lee, G., et al. (2016). Capturing the biology of disease severity in a  
683 PSC-based model of familial dysautonomia. *Nat. Med.* 22, 1421-1427. 10.1038/nm.4220.
- 684 24. Brunt, P.W., and McKusick, V.A. (1970). Familial dysautonomia. A report of genetic and  
685 clinical studies, with a review of the literature. *Medicine (Baltimore)* 49, 343-374.
- 686 25. Lehavi, O., Aizenstein, O., Bercovich, D., Pavzner, D., Shomrat, R., Orr-Urtreger, A., and  
687 Yaron, Y. (2003). Screening for familial dysautonomia in Israel: evidence for higher carrier rate  
688 among Polish Ashkenazi Jews. *Genetic testing* 7, 139-142. 10.1089/109065703322146830.
- 689 26. Axelrod, F.B. (2005). Familial dysautonomia: a review of the current pharmacological  
690 treatments. *Expert. Opin. Pharmacother.* 6, 561-567. 10.1517/14656566.6.4.561.
- 691 27. Axelrod, F.B., Nachtigal, R., and Dancis, J. (1974). Familial dysautonomia: diagnosis,  
692 pathogenesis and management. *Adv. Pediatr.* 21, 75-96.
- 693 28. Pearson, J. (1979). Familial dysautonomia (a brief review). *J. Auton. Nerv. Syst.* 1, 119-  
694 126.

- 695 29. Pearson, J., and Pytel, B. (1978). Quantitative studies of ciliary and sphenopalatine ganglia  
696 in familial dysautonomia. *J. Neurol. Sci.* 39, 123-130.
- 697 30. Pearson, J., Pytel, B.A., Grover-Johnson, N., Axelrod, F., and Dancis, J. (1978).  
698 Quantitative studies of dorsal root ganglia and neuropathologic observations on spinal cords in  
699 familial dysautonomia. *J. Neurol. Sci.* 35, 77-92.
- 700 31. Mahloudji, M., Brunt, P.W., and McKusick, V.A. (1970). Clinical neurological aspects of  
701 familial dysautonomia. *J. Neurol. Sci.* 11, 383-395.
- 702 32. Axelrod, F.B. (2004). Familial dysautonomia. *Muscle Nerve* 29, 352-363.  
703 10.1002/mus.10499.
- 704 33. Hilz, M.J., Kolodny, E.H., Neuner, I., Stemper, B., and Axelrod, F.B. (1998). Highly  
705 abnormal thermotests in familial dysautonomia suggest increased cardiac autonomic risk. *J.*  
706 *Neurol. Neurosurg. Psychiatry* 65, 338-343.
- 707 34. Brunt, P.W. (1967). Unusual cause of Charcot joints in early adolescence (Riley-Day  
708 syndrome). *Br. Med. J.* 4, 277-278.
- 709 35. Mendoza-Santiesteban, C.E., Palma, J.A., Hedges, T.R., 3rd, Laver, N.V., Farhat, N.,  
710 Norcliffe-Kaufmann, L., and Kaufmann, H. (2017). Pathological Confirmation of Optic  
711 Neuropathy in Familial Dysautonomia. *J. Neuropathol. Exp. Neurol.* 76, 238-244.  
712 10.1093/jnen/nlw118.
- 713 36. Mendoza-Santiesteban, C.E., Hedges Iii, T.R., Norcliffe-Kaufmann, L., Axelrod, F., and  
714 Kaufmann, H. Selective retinal ganglion cell loss in familial dysautonomia. *J. Neurol.* 261, 702-  
715 709. 10.1007/s00415-014-7258-2.
- 716 37. Kaplan, L., Margulies, J.Y., Kadari, A., Floman, Y., and Robin, G.C. (1997). Aspects of  
717 spinal deformity in familial dysautonomia (Riley-Day syndrome). *Eur. Spine J.* 6, 33-38.



- 718 38. Ford, D.M., Bagnall, K.M., Clements, C.A., and McFadden, K.D. (1988). Muscle spindles  
719 in the paraspinal musculature of patients with adolescent idiopathic scoliosis. *Spine (Phila Pa*  
720 *1976) 13*, 461-465.
- 721 39. Macefield, V.G., Norcliffe-Kaufmann, L., Gutierrez, J., Axelrod, F.B., and Kaufmann, H.  
722 (2011). Can loss of muscle spindle afferents explain the ataxic gait in Riley-Day syndrome? *Brain*  
723 *134*, 3198-3208. 10.1093/brain/awr168.
- 724 40. Hilz, M.J., Axelrod, F.B., Bickel, A., Stemper, B., Brys, M., Wendelschafer-Crabb, G., and  
725 Kennedy, W.R. (2004). Assessing function and pathology in familial dysautonomia: assessment  
726 of temperature perception, sweating and cutaneous innervation. *Brain 127*, 2090-2098.  
727 10.1093/brain/awh235.
- 728 41. Kaufmann, H., and Biaggioni, I. (2003). Autonomic failure in neurodegenerative disorders.  
729 *Semin. Neurol. 23*, 351-363. 10.1055/s-2004-817719.
- 730 42. Norcliffe-Kaufmann, L., Axelrod, F., and Kaufmann, H. Afferent baroreflex failure in  
731 familial dysautonomia. *Neurology 75*, 1904-1911. 75/21/1904 [pii]  
732 10.1212/WNL.0b013e3181feb283.
- 733 43. Norcliffe-Kaufmann, L., and Kaufmann, H. Familial dysautonomia (Riley-Day syndrome):  
734 when baroreceptor feedback fails. *Auton. Neurosci. 172*, 26-30. S1566-0702(12)00180-4 [pii]  
735 10.1016/j.autneu.2012.10.012.
- 736 44. Norcliffe-Kaufmann, L., Slaugenhaupt, S.A., and Kaufmann, H. (2017). Familial  
737 dysautonomia: History, genotype, phenotype and translational research. *Prog. Neurobiol. 152*,  
738 131-148. 10.1016/j.pneurobio.2016.06.003.

- 739 45. Macefield, V.G., Norcliffe-Kaufmann, L.J., Axelrod, F.B., and Kaufmann, H. (2013).  
740 Relationship between proprioception at the knee joint and gait ataxia in HSAN III. *Mov. Disord.*  
741 28, 823-827. 10.1002/mds.25482.
- 742 46. Mass, E., Brin, I., Belostoky, L., Maayan, C., and Gadoth, N. (1998). A cephalometric  
743 evaluation of craniofacial morphology in familial dysautonomia. *Cleft Palate Craniofac. J.* 35, 120-  
744 126. 10.1597/1545-1569(1998)035<0120:ACEOCM>2.3.CO;2.
- 745 47. Mendoza-Santiesteban, C.E., Hedges, T.R., 3rd, Norcliffe-Kaufmann, L., Warren, F.,  
746 Reddy, S., Axelrod, F.B., and Kaufmann, H. (2012). Clinical neuro-ophthalmic findings in familial  
747 dysautonomia. *J Neuroophthalmol* 32, 23-26. 10.1097/WNO.0b013e318230feab.
- 748 48. Mendoza-Santiesteban, C.E., Hedges Iii, T.R., Norcliffe-Kaufmann, L., Axelrod, F., and  
749 Kaufmann, H. (2014). Selective retinal ganglion cell loss in familial dysautonomia. *J Neurol* 261,  
750 702-709. 10.1007/s00415-014-7258-2.
- 751 49. Liebman, S.D. (1956). Ocular manifestations of Riley-Day syndrome; familial autonomic  
752 dysfunction. *AMA Arch Ophthalmol* 56, 719-725. 10.1001/archopht.1956.00930040727011.
- 753 50. Kroop, I.G. (1956). The production of tears in familial dysautonomia; preliminary report.  
754 *J. Pediatr.* 48, 328-329.
- 755 51. Josaitis, C.A., and Matisoff, M. (2002). Familial dysautonomia in review: diagnosis and  
756 treatment of ocular manifestations. *Adv. Exp. Med. Biol.* 506, 71-80.
- 757 52. Liebman, S.D. (1968). Riley-Day syndrome: long-term ophthalmologic observations.  
758 *Trans. Am. Ophthalmol. Soc.* 66, 95-116.
- 759 53. Goldberg, M.F., Payne, J.W., and Brunt, P.W. (1968). Ophthalmologic studies of familial  
760 dysautonomia. The Riley-Day syndrome. *Arch. Ophthalmol.* 80, 732-743.

- 761 54. Sinha, R., Kim, Y.J., Nomakuchi, T., Sahashi, K., Hua, Y., Rigo, F., Bennett, C.F., and  
762 Krainer, A.R. (2018). Antisense oligonucleotides correct the familial dysautonomia splicing defect  
763 in IKBKAP transgenic mice. *Nucleic Acids Res* 46, 4833-4844. 10.1093/nar/gky249.
- 764 55. Donadon, I., Pinotti, M., Rajkowska, K., Pianigiani, G., Barbon, E., Morini, E., Motaln,  
765 H., Rogelj, B., Mingozzi, F., Slaugenhaupt, S.A., and Pagani, F. (2018). Exon-specific U1 snRNAs  
766 improve ELP1 exon 20 definition and rescue ELP1 protein expression in a familial dysautonomia  
767 mouse model. *Hum Mol Genet* 27, 2466-2476. 10.1093/hmg/ddy151.
- 768 56. Morini, E., Gao, D., Montgomery, C.M., Salani, M., Mazzasette, C., Krussig, T.A., Swain,  
769 B., Dietrich, P., Narasimhan, J., Gabbeta, V., et al. (2019). ELP1 Splicing Correction Reverses  
770 Proprioceptive Sensory Loss in Familial Dysautonomia. *Am. J. Hum. Genet.* 104, 638-650.  
771 10.1016/j.ajhg.2019.02.009.
- 772 57. Slaugenhaupt, S.A., Mull, J., Leyne, M., Cuajungco, M.P., Gill, S.P., Hims, M.M.,  
773 Quintero, F., Axelrod, F.B., and Gusella, J.F. (2004). Rescue of a human mRNA splicing defect  
774 by the plant cytokinin kinetin. *Hum. Mol. Genet.* 13, 429-436. 10.1093/hmg/ddh046  
775 ddh046 [pii].
- 776 58. Axelrod, F.B., Liebes, L., Gold-Von Simson, G., Mendoza, S., Mull, J., Leyne, M.,  
777 Norcliffe-Kaufmann, L., Kaufmann, H., and Slaugenhaupt, S.A. (2011). Kinetin improves  
778 IKBKAP mRNA splicing in patients with familial dysautonomia. *Pediatr. Res.* 70, 480-483.  
779 10.1038/pr.2011.705  
780 10.1203/PDR.0b013e31822e1825.
- 781 59. Chekuri, A., Logan, E.M., Krauson, A.J., Salani, M., Ackerman, S., Kirchner, E.G.,  
782 Bolduc, J.M., Wang, X., Dietrich, P., Dragatsis, I., et al. (2021). Selective retinal ganglion cell loss

- 783 and optic neuropathy in a humanized mouse model of familial dysautonomia. *Hum. Mol. Genet.*  
784 10.1093/hmg/ddab359.
- 785 60. Gao, D., Morini, E., Salani, M., Krauson, A.J., Chekuri, A., Sharma, N., Ragavendran, A.,  
786 Erdin, S., Logan, E.M., Li, W., et al. (2021). A deep learning approach to identify gene targets of  
787 a therapeutic for human splicing disorders. *Nature communications* 12, 3332. 10.1038/s41467-  
788 021-23663-2.
- 789 61. Salani, M., Urbina, F., Brenner, A., Morini, E., Shetty, R., Gallagher, C.S., Law, E.A.,  
790 Sunshine, S., Finneran, D.J., Johnson, G., et al. (2018). Development of a Screening Platform to  
791 Identify Small Molecules That Modify ELP1 Pre-mRNA Splicing in Familial Dysautonomia.  
792 *SLAS Discov*, 2472555218792264. 10.1177/2472555218792264.
- 793 62. Hims, M.M., Shetty, R.S., Pickel, J., Mull, J., Leyne, M., Liu, L., Gusella, J.F., and  
794 Slaugenhaupt, S.A. (2007). A humanized IKBKAP transgenic mouse models a tissue-specific  
795 human splicing defect. *Genomics* 90, 389-396. S0888-7543(07)00142-5 [pii]  
796 10.1016/j.ygeno.2007.05.012.
- 797 63. Shetty, R.S., Gallagher, C.S., Chen, Y.T., Hims, M.M., Mull, J., Leyne, M., Pickel, J.,  
798 Kwok, D., and Slaugenhaupt, S.A. (2011). Specific correction of a splice defect in brain by  
799 nutritional supplementation. *Hum. Mol. Genet.* 20, 4093-4101. 10.1093/hmg/ddr333.
- 800 64. Morini, E., Dietrich, P., Salani, M., Downs, H.M., Wojtkiewicz, G.R., Alli, S., Brenner,  
801 A., Nilbratt, M., LeClair, J.W., Oaklander, A.L., et al. (2016). Sensory and autonomic deficits in  
802 a new humanized mouse model of familial dysautonomia. *Hum. Mol. Genet.* 25, 1116-1128.  
803 10.1093/hmg/ddv634.

- 804 65. De Munter, S., Bamps, D., Malheiro, A.R., Kumar Baboota, R., Brites, P., and Baes, M.  
805 (2018). Autonomous Purkinje cell axonal dystrophy causes ataxia in peroxisomal multifunctional  
806 protein-2 deficiency. *Brain Pathol.* 28, 631-643. 10.1111/bpa.12586.
- 807 66. Timotius, I.K., Canneva, F., Minakaki, G., Pasluosta, C., Mocerri, S., Casadei, N., Riess,  
808 O., Winkler, J., Klucken, J., von Horsten, S., and Eskofier, B. (2018). Dynamic footprints of alpha-  
809 synucleinopathic mice recorded by CatWalk gait analysis. *Data Brief* 17, 189-193.  
810 10.1016/j.dib.2017.12.067.
- 811 67. Bozkurt, A., Deumens, R., Scheffel, J., O'Dey, D.M., Weis, J., Joosten, E.A., Fuhrmann,  
812 T., Brook, G.A., and Pallua, N. (2008). CatWalk gait analysis in assessment of functional recovery  
813 after sciatic nerve injury. *J. Neurosci. Methods* 173, 91-98. 10.1016/j.jneumeth.2008.05.020.
- 814 68. Hamers, F.P., Koopmans, G.C., and Joosten, E.A. (2006). CatWalk-assisted gait analysis  
815 in the assessment of spinal cord injury. *J. Neurotrauma* 23, 537-548. 10.1089/neu.2006.23.537.
- 816 69. Axelrod, F.B., Iyer, K., Fish, I., Pearson, J., Sein, M.E., and Spielholz, N. (1981).  
817 Progressive sensory loss in familial dysautonomia. *Pediatrics* 67, 517-522.
- 818 70. Akay, T., Tourtellotte, W.G., Arber, S., and Jessell, T.M. (2014). Degradation of mouse  
819 locomotor pattern in the absence of proprioceptive sensory feedback. *Proc. Natl. Acad. Sci. U. S.*  
820 *A.* 111, 16877-16882. 10.1073/pnas.1419045111.
- 821 71. Takakusaki, K. (2017). Functional Neuroanatomy for Posture and Gait Control. *J Mov*  
822 *Disord* 10, 1-17. 10.14802/jmd.16062.
- 823 72. Leyne, M., Mull, J., Gill, S.P., Cuajungco, M.P., Oddoux, C., Blumenfeld, A., Maayan, C.,  
824 Gusella, J.F., Axelrod, F.B., and Slaugenhaupt, S.A. (2003). Identification of the first non-Jewish  
825 mutation in familial Dysautonomia. *Am. J. Med. Genet. A* 118A, 305-308. 10.1002/ajmg.a.20052.

- 826 73. Slaugenhaupt, S.A., Blumenfeld, A., Gill, S.P., Leyne, M., Mull, J., Cuajungco, M.P.,  
827 Liebert, C.B., Chadwick, B., Idelson, M., Reznik, L., et al. (2001). Tissue-specific expression of a  
828 splicing mutation in the IKBKAP gene causes familial dysautonomia. *Am. J. Hum. Genet.* 68,  
829 598-605. S0002-9297(07)63100-0 [pii].
- 830 74. Romano, G., Riccardi, F., Bussani, E., Vodret, S., Licastro, D., Ragone, I., Ronzitti, G.,  
831 Morini, E., Slaugenhaupt, S.A., and Pagani, F. (2022). Rescue of a familial dysautonomia mouse  
832 model by AAV9-Exon-specific U1 snRNA. *Am. J. Hum. Genet.* 10.1016/j.ajhg.2022.07.004.
- 833 75. Rinaldi, C., and Wood, M.J.A. (2018). Antisense oligonucleotides: the next frontier for  
834 treatment of neurological disorders. *Nat Rev Neurol* 14, 9-21. 10.1038/nrneurol.2017.148.
- 835 76. Frazier, K.S. (2015). Antisense oligonucleotide therapies: the promise and the challenges  
836 from a toxicologic pathologist's perspective. *Toxicol Pathol* 43, 78-89.  
837 10.1177/0192623314551840.
- 838 77. Bennett, C.F., Baker, B.F., Pham, N., Swayze, E., and Geary, R.S. (2017). Pharmacology  
839 of Antisense Drugs. *Annu Rev Pharmacol Toxicol* 57, 81-105. 10.1146/annurev-pharmtox-  
840 010716-104846.
- 841 78. Wurster, C.D., and Ludolph, A.C. (2018). Antisense oligonucleotides in neurological  
842 disorders. *Ther Adv Neurol Disord* 11, 1756286418776932. 10.1177/1756286418776932.
- 843 79. Hua, Y., Sahashi, K., Hung, G., Rigo, F., Passini, M.A., Bennett, C.F., and Krainer, A.R.  
844 (2010). Antisense correction of SMN2 splicing in the CNS rescues necrosis in a type III SMA  
845 mouse model. *Genes Dev.* 24, 1634-1644. 10.1101/gad.1941310.
- 846 80. Passini, M.A., Bu, J., Richards, A.M., Kinnecom, C., Sardi, S.P., Stanek, L.M., Hua, Y.,  
847 Rigo, F., Matson, J., Hung, G., et al. (2011). Antisense oligonucleotides delivered to the mouse

- 848 CNS ameliorate symptoms of severe spinal muscular atrophy. *Sci. Transl. Med.* *3*, 72ra18.  
849 10.1126/scitranslmed.3001777.
- 850 81. Woll, M.G., Qi, H., Turpoff, A., Zhang, N., Zhang, X., Chen, G., Li, C., Huang, S., Yang,  
851 T., Moon, Y.C., et al. (2016). Discovery and Optimization of Small Molecule Splicing Modifiers  
852 of Survival Motor Neuron 2 as a Treatment for Spinal Muscular Atrophy. *J. Med. Chem.* *59*, 6070-  
853 6085. 10.1021/acs.jmedchem.6b00460.
- 854 82. Ratni, H., Ebeling, M., Baird, J., Bendels, S., Bylund, J., Chen, K.S., Denk, N., Feng, Z.,  
855 Green, L., Guerard, M., et al. (2018). Discovery of Risdiplam, a Selective Survival of Motor  
856 Neuron-2 (SMN2) Gene Splicing Modifier for the Treatment of Spinal Muscular Atrophy (SMA).  
857 *J. Med. Chem.* *61*, 6501-6517. 10.1021/acs.jmedchem.8b00741.
- 858 83. Palacino, J., Swalley, S.E., Song, C., Cheung, A.K., Shu, L., Zhang, X., Van Hoosear, M.,  
859 Shin, Y., Chin, D.N., Keller, C.G., et al. (2015). SMN2 splice modulators enhance U1-pre-mRNA  
860 association and rescue SMA mice. *Nat. Chem. Biol.* *11*, 511-517. 10.1038/nchembio.1837.
- 861 84. Ueki, Y., Ramirez, G., Salcedo, E., Stabio, M.E., and Lefcort, F. (2016). Loss of Ikbkap  
862 Causes Slow, Progressive Retinal Degeneration in a Mouse Model of Familial Dysautonomia.  
863 *eNeuro* *3*. 10.1523/ENEURO.0143-16.2016.
- 864 85. Hims, M.M., Ibrahim, E.C., Leyne, M., Mull, J., Liu, L., Lazaro, C., Shetty, R.S., Gill, S.,  
865 Gusella, J.F., Reed, R., and Slaughaupt, S.A. (2007). Therapeutic potential and mechanism of  
866 kinetin as a treatment for the human splicing disease familial dysautonomia. *J. Mol. Med. (Berl.)*  
867 *85*, 149-161. 10.1007/s00109-006-0137-2.
- 868 86. Ibrahim, E.C., Hims, M.M., Shomron, N., Burge, C.B., Slaughaupt, S.A., and Reed, R.  
869 (2007). Weak definition of IKBKAP exon 20 leads to aberrant splicing in familial dysautonomia.  
870 *Hum. Mutat.* *28*, 41-53. 10.1002/humu.20401.

- 871 87. Landis, S.C., Amara, S.G., Asadullah, K., Austin, C.P., Blumenstein, R., Bradley, E.W.,  
872 Crystal, R.G., Darnell, R.B., Ferrante, R.J., Fillit, H., et al. (2012). A call for transparent reporting  
873 to optimize the predictive value of preclinical research. *Nature* 490, 187-191.  
874 10.1038/nature11556.
- 875 88. Dietrich, P., Alli, S., Shanmugasundaram, R., and Dragatsis, I. (2012). IKAP expression  
876 levels modulate disease severity in a mouse model of familial dysautonomia. *Hum. Mol. Genet.*  
877 21, 5078-5090. 10.1093/hmg/dds354.
- 878 89. Dietrich, P., Yue, J., E, S., and Dragatsis, I. (2011). Deletion of exon 20 of the Familial  
879 Dysautonomia gene *Ikbkap* in mice causes developmental delay, cardiovascular defects, and early  
880 embryonic lethality. *PLoS One* 6, e27015. 10.1371/journal.pone.0027015.
- 881 90. Ueki, Y., Shchepetkina, V., and Lefcort, F. (2018). Retina-specific loss of *Ikbkap/Elp1*  
882 causes mitochondrial dysfunction that leads to selective retinal ganglion cell degeneration in a  
883 mouse model of familial dysautonomia. *Dis Model Mech* 11. 10.1242/dmm.033746.
- 884 91. Mead, B., Thompson, A., Scheven, B.A., Logan, A., Berry, M., and Leadbeater, W. (2014).  
885 Comparative evaluation of methods for estimating retinal ganglion cell loss in retinal sections and  
886 wholemounts. *PLoS One* 9, e110612. 10.1371/journal.pone.0110612.

887

888



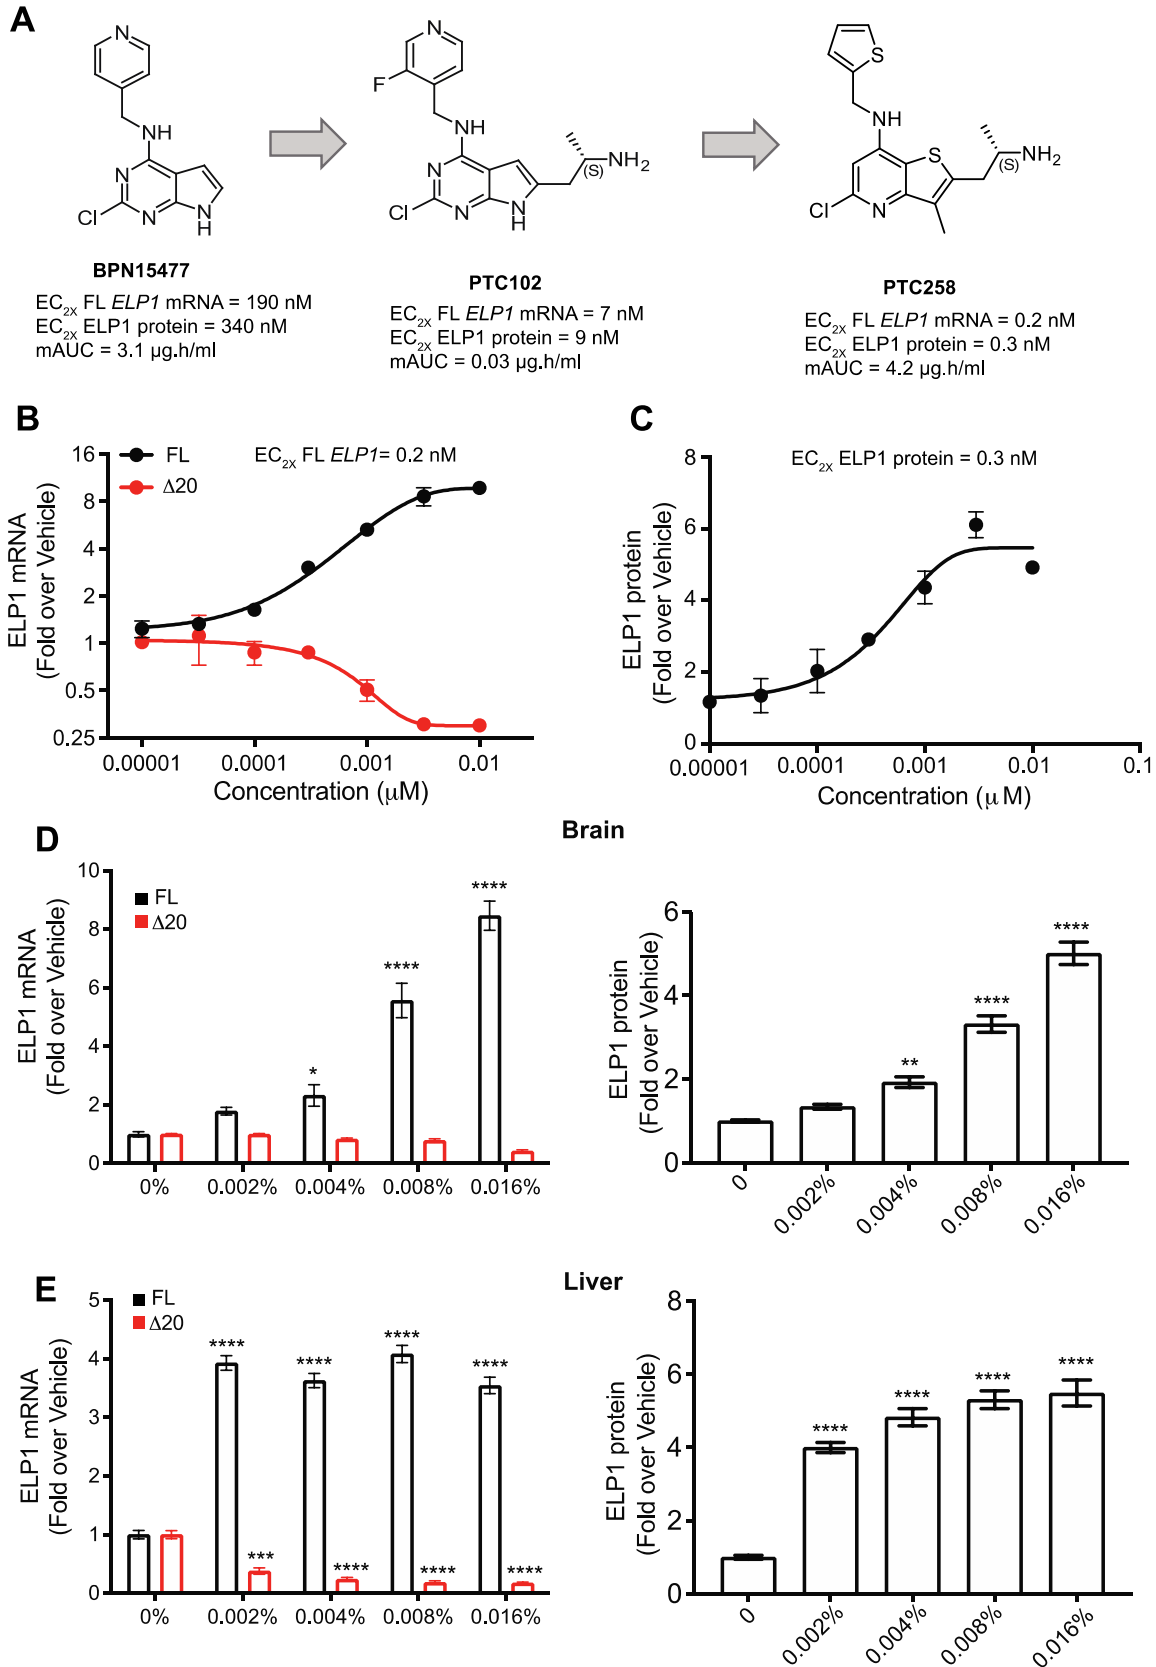

890 **Figure 1. Identification of the novel small molecule splicing modulator PTC258.** (A) Chemical  
891 optimization of BPN15477 to generate a more potent splicing modulator. Compounds were  
892 screened based on increasing the amount of full-length (FL) ELP1 mRNA, measured by qRT-  
893 PCR, and ELP1 protein, measured by Homogeneous Time Resolved Fluorescence (HTRF), in FD  
894 patient fibroblasts.  $EC_{2X}$  is the Effective concentration of the drug that achieves a 2-fold change in  
895 biological response relative to baseline. mAUC is the mouse area under the plasma drug  
896 concentration-time curve, reflects the actual body exposure to drug after administration of a dose  
897 of the drug and is expressed  $\mu\text{g}\cdot\text{h}/\text{ml}$ . (B) Representative dose response curve of mutant ( $\Delta 20$ ) and  
898 full-length (FL) *ELP1* transcripts in FD fibroblasts treated with increasing concentration of  
899 PTC258. Cells were treated for 24 h at the concentrations indicated (n = 6). (C) ELP1 protein  
900 expression in FD fibroblasts treated with increasing concentration of PTC258. Cells were treated  
901 for 24 h at the concentrations indicated (n = 6). (D and E) Relative expression of full-length (FL)  
902 and  $\Delta 20$  ELP1 mRNA (left panel), and ELP1 protein quantification (right panel) in brain and liver  
903 after oral administration of PTC258 in chow ranging from 0.002% to 0.016% in adult transgenic  
904 *TgFD9* mouse (n =6-11). The adjusted P values are displayed. \*P< 0.05, \*\*P< 0.01, \*\*\*P< 0.001  
905 and \*\*\*\*P< 0.0001, one-way ANOVA with Dunnett's multiple comparison test. Data are shown as  
906 average  $\pm$  s.e.m.

907

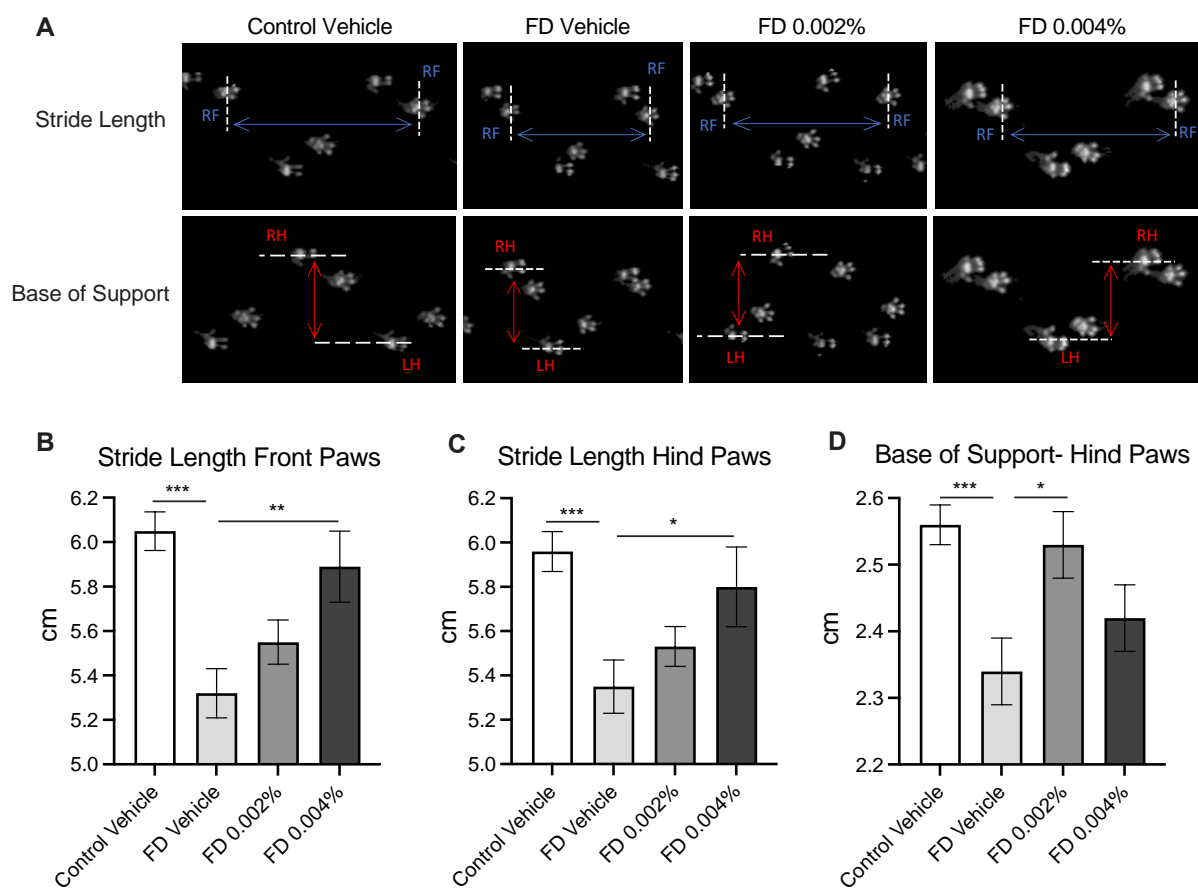

908

909 **Figure 2. PTC258 improves motor coordination in the FD mice.** (A) Representative Catwalk

910 images of vehicle-treated control mice and vehicle-treated and PTC258-treated FD mice at 6

911 months of age. Stride length is defined as the distance between successive placements of the

912 same paw (blue double-headed arrows), while the base of support represents the mean distance

913 between hind paws (red double-headed arrows). Measurements of stride length front paws (B),

914 stride length hind paws (C) and base of support hind paws (D) in vehicle-treated control mice

915 (n=20) and vehicle-treated (n=16), 0.002% PTC258-treated (n=16) and 0.004% PTC258-treated

916 (n=9) FD mice at 6 months of age. The adjusted P values are displayed. \*P< 0.05, \*\*P< 0.01

917 and \*\*\*P< 0.001, two-tailed unpaired Student's t-test with FDR correction. Data are shown as

918 average ± s.e.m.

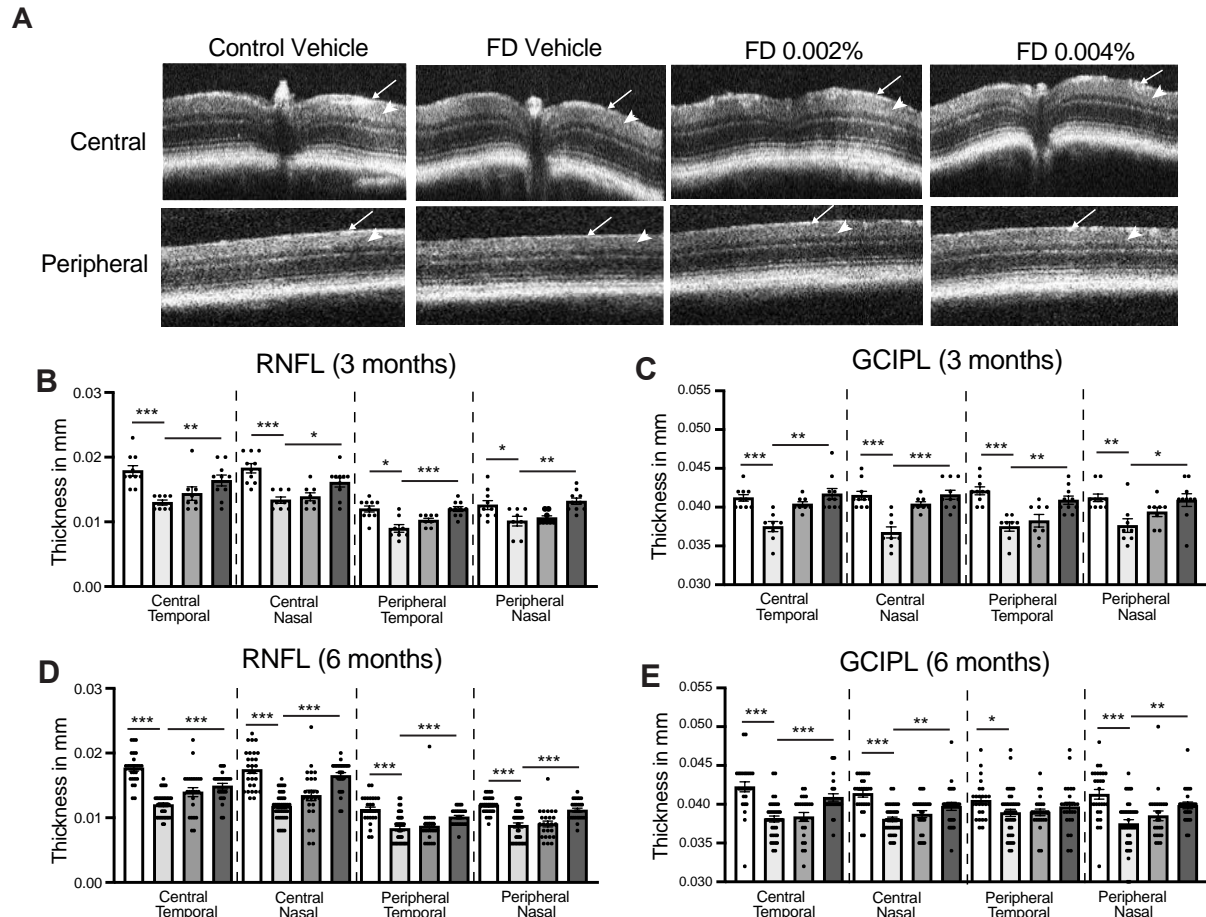

919

920 **Figure 3. PTC258 rescues retinal degeneration in the FD mice.** (A) Representative SD-OCT b-  
 921 scan images of vehicle-treated control retinæ and vehicle-treated and PTC258-treated FD retinæ  
 922 at 6 months of age. Arrows indicate the retinal nerve fiber layer (RNFL) while arrowheads indicate  
 923 the ganglion cell-inner plexiform layer (GCIPL). Thickness measurements of RNFL (B) and GCIPL  
 924 (C) in both central and peripheral regions of the retina in nasal and temporal hemispheres at 3  
 925 months in vehicle-treated control retinæ (n=10), and vehicle-treated (n=8), 0.002% PTC258-  
 926 treated (n=8) and 0.004% PTC258-treated (n=10) FD retinæ. (D) Thickness measurements of  
 927 RNFL (D) and GCIPL (E) in both central and peripheral regions of the retina in nasal and temporal  
 928 hemispheres at 6 months in vehicle-treated control retinæ (n=26), and vehicle-treated (n=38),  
 929 0.002% PTC258-treated (n=24) and 0.004% PTC258-treated (n=25-26) FD retinæ. White bars

930 represent control mice, light grey bars represent vehicle-treated FD mice, grey bars represent  
931 0.002% PTC258-treated FD mice and dark grey bars represent 0.004% PTC258-treated FD mice.  
932 The adjusted P values are displayed. \*P < 0.05, \*\*P < 0.01 and \*\*\*P < 0.001, two-tailed unpaired  
933 Student's t-test with FDR correction. Data are shown as average  $\pm$  s.e.m., each data point  
934 represents an individual retina.  
935  
936

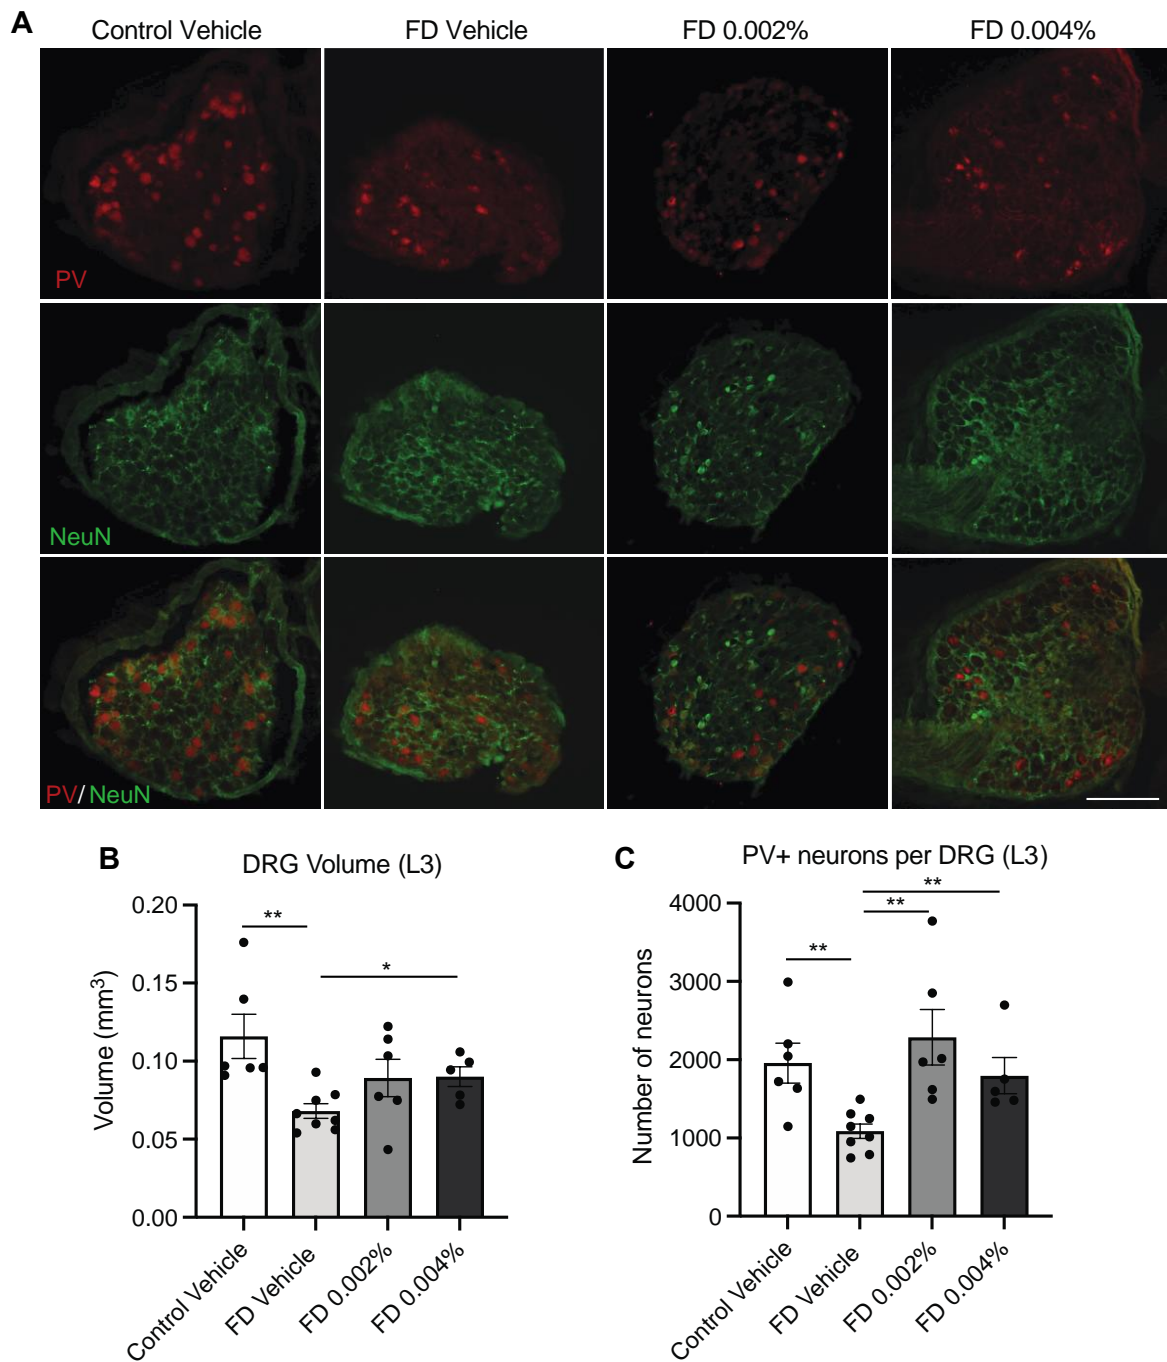

937

938 **Figure 4. PTC258 treatment rescues proprioceptive sensory loss in the FD mice. (A)**

939 Representative images of proprioceptive (PV+) neurons (red), whole sensory (Nissl+) neurons

940 (green) and the merged image (bottom) in L3 DRG from vehicle-treated control mice and vehicle-

941 treated and PTC258-treated FD mice at 6 months of age. Scale bar, 200  $\mu$ m. **(B)** Total volume of

942 the L3 DRG measured in vehicle-treated control mice (n =5), and vehicle-treated (n=8), 0.002%  
943 PTC258-treated (n=6) and 0.004% PTC258-treated (n=5) FD mice. (C) Total number of PV+  
944 proprioceptive neurons per DRG counted in vehicle-treated control mice (n =5), and vehicle-  
945 treated (n=8), 0.002% PTC258-treated (n=6) and 0.004% PTC258-treated (n=5) FD mice. The  
946 adjusted P values are displayed. \*P< 0.05 and \*\*P< 0.01, two-tailed unpaired Student's t-test with  
947 FDR correction. Data are shown as average  $\pm$  s.e.m., each data point represents an individual  
948 animal.

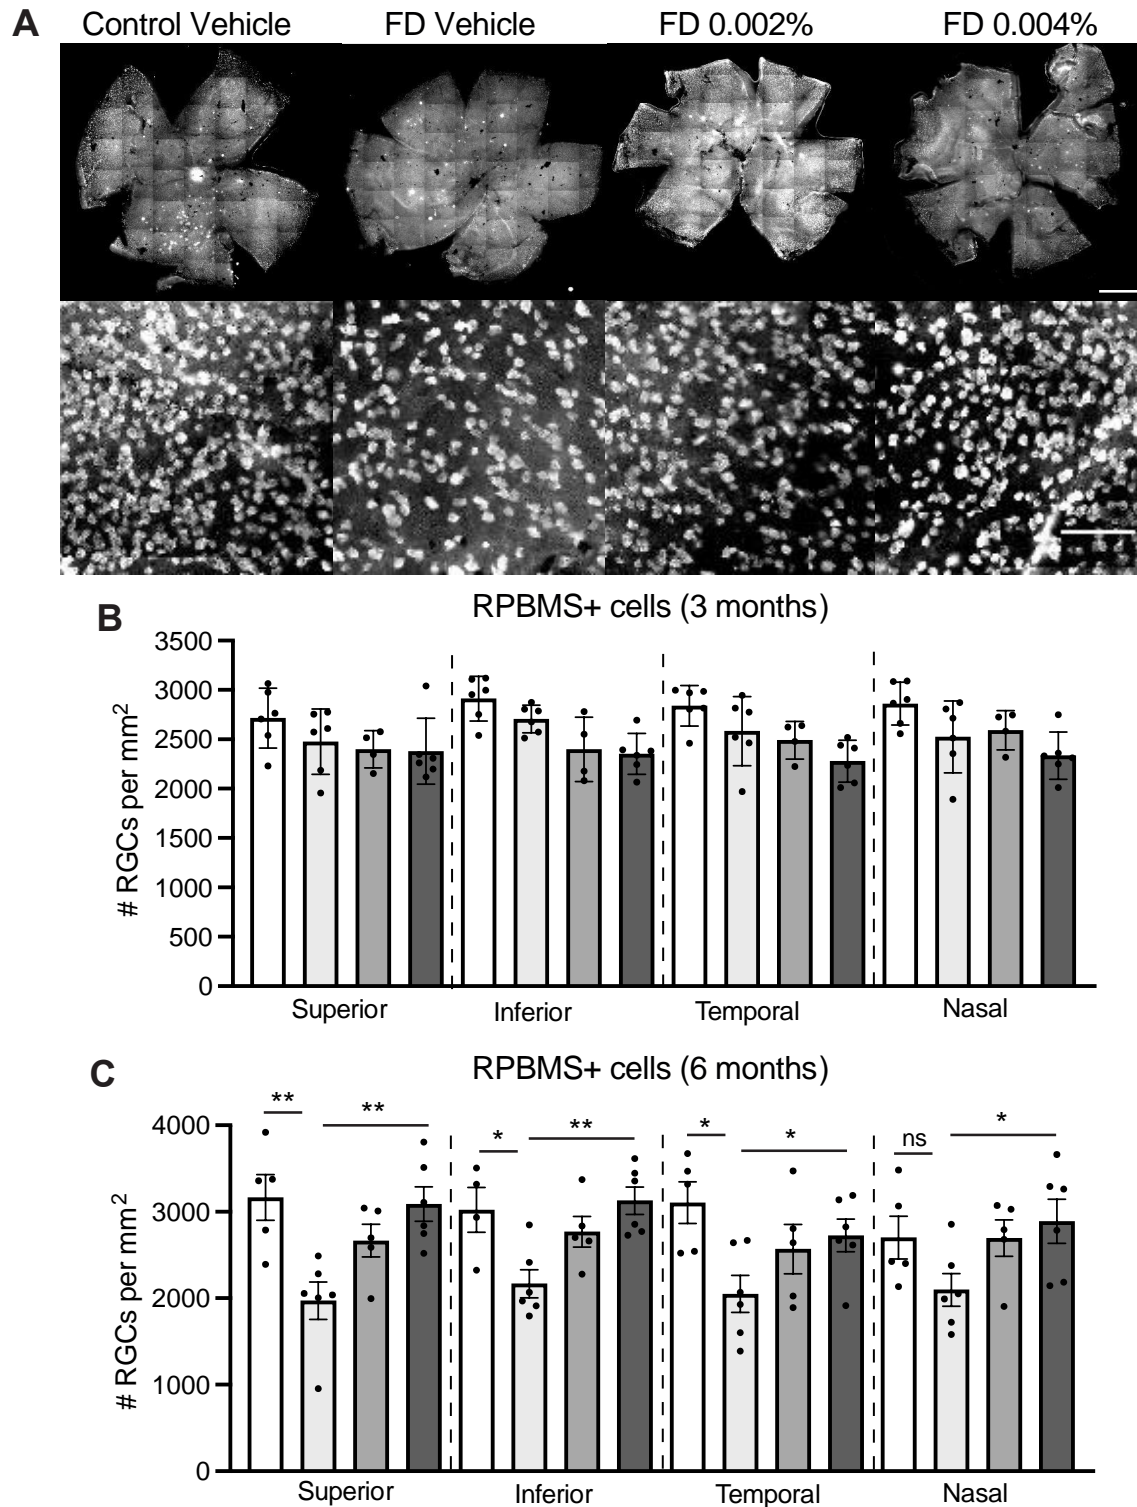

949

950 **Figure 5. PTC258 prevents RGC loss in FD retinas.** (A) Representative retinal whole-mount

951 (top) and higher magnification of RPBMS staining (bottom) from vehicle-treated control mice and



952 vehicle-treated and PTC258-treated FD mice stained with RGC marker RBPMS (top panels). Scale  
953 bars, 100  $\mu\text{m}$  (top) and 0.5  $\mu\text{m}$  (bottom). RPBMS<sup>+</sup> cells were counted in each quadrant in superior  
954 (S), inferior (I), nasal (N), and temporal regions at 1mm from the optic nerve head (ONH) at 3 and  
955 6 months of age. **(B)** Bar plots of RPBMS<sup>+</sup> cell counts in 3 month-retinae from vehicle-treated  
956 control mice (n=6), and vehicle-treated (n=6), 0.002% PTC258-treated (n=4) and 0.004%  
957 PTC258-treated (n=6) FD mice. **(C)** Bar plots of RPBMS<sup>+</sup> cell counts in 6 month-retinae from  
958 vehicle-treated control mice (n=5), and vehicle-treated (n=6), 0.002% PTC258-treated (n=5) and  
959 0.004% PTC258-treated (n=6) FD mice. White bars represent control mice, light grey bars  
960 represent vehicle-treated FD mice, grey bars represent 0.002% PTC258-treated FD mice and dark  
961 grey bars represent 0.004% PTC258-treated FD mice. The adjusted P values are displayed. \*P<  
962 0.05 and \*\*P< 0.01, two-tailed unpaired Student's t-test with FDR correction. ns: not significant.  
963 Data are shown as average  $\pm$  s.e.m., each data point represents an individual retina.  
964

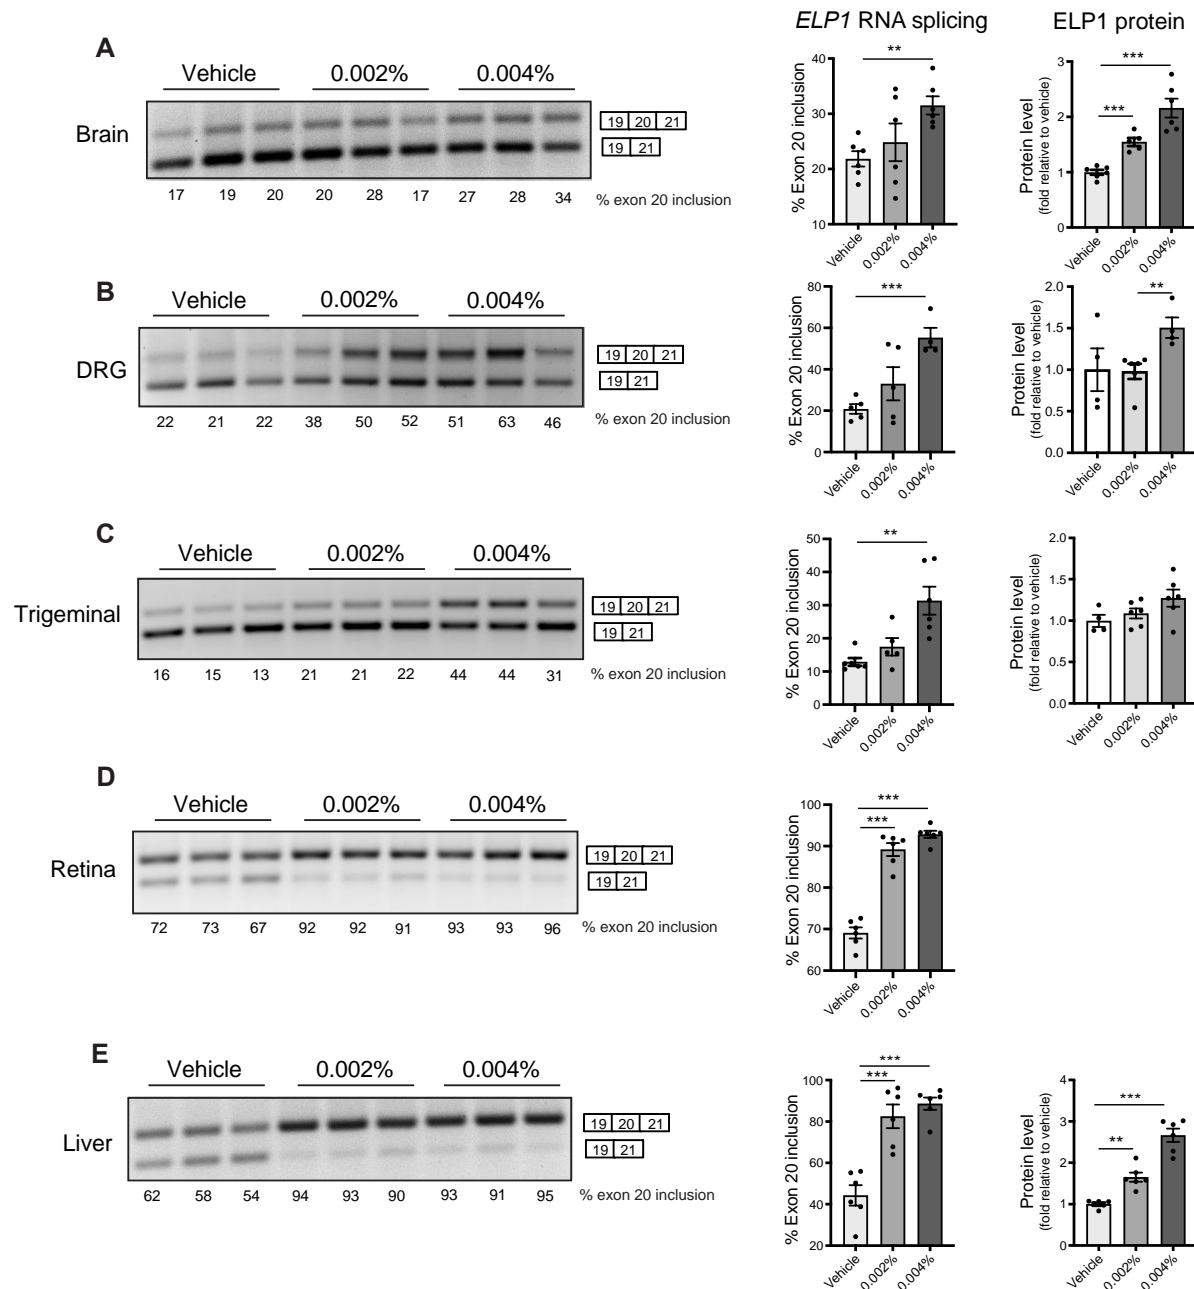

965

966 **Figure 6. PTC258 treatment increases full-length *ELP1* transcript and protein in the FD**

967 **mice.** Representative splicing analysis of human *ELP1* transcripts (left), percent of exon 20

968 inclusion (middle) and levels of ELP1 (right) from vehicle-treated (n=5-6, light grey), 0.002%

969 PTC258-treated (n=5-6, grey) and 0.004% PTC258-treated (n=4-6, dark grey) FD mice at 6

970 months of age. in brain (**A**), DRG (**B**), trigeminal (**C**), retina (**D**) and liver (**E**). The adjusted P  
971 values are displayed. \*\*P< 0.01 and \*\*\*P< 0.001, two-tailed unpaired Student's t-test with FDR  
972 correction. Data are shown as average  $\pm$  s.e.m., each data point represents an individual animal.  
973
